# Supplementary material for: X-Ray crystallographic and spectroscopic properties of eight Schiff bases as evidence of the proton transfer reaction. Role of the intermolecular hydrogen bond
Source: Royal Society of Chemistry journal article supplement (doi:10.1039/c0nj00179a), 2010-10-11

## **X-ray Crystallographic and Spectroscopic Properties of Eight Schiff Bases as Evidence of the Proton Transfer Reaction. Role of the Intermolecular Hydrogen Bond.**

Oscar Domínguez,<sup>‡</sup> Braulio Rodríguez-Molina,<sup>‡</sup> Mario Rodríguez,<sup>†</sup> Armando Ariza,<sup>‡</sup> Norberto Farfán<sup>§</sup>  
and Rosa Santillan,<sup>\*,‡</sup>

<sup>‡</sup>*Departamento de Química, Centro de Investigación y de Estudios Avanzados del IPN, CINVESTAV, Apdo. Postal 14-740, México, D. F., 07000, México.*

<sup>†</sup>*Centro de Investigaciones en Óptica, CIO, Apdo. Postal 1-948, 37000 León Gto., México.*

<sup>§</sup>*Facultad de Química, Departamento de Química Orgánica, UNAM, Circuito Exterior, Ciudad Universitaria, Coyoacán, México, D.F., 04510, México.*

To whom the correspondence should be addressed: [rsantill@cinvestav.mx](mailto:rsantill@cinvestav.mx)

### **Supplementary Information**

| <b>Contents:</b>                                                                                                      | <b>Page</b> |
|-----------------------------------------------------------------------------------------------------------------------|-------------|
| I Synthesis and characterization of compounds <b>1-8</b>                                                              | S2-S4       |
| II <sup>1</sup> H and <sup>13</sup> C NMR spectra of compounds <b>1-8</b>                                             | S5-S20      |
| III Aromatic region of the <sup>1</sup> H spectrum of compound <b>5</b> upon heating in DMSO- <i>d</i> <sub>6</sub> . | S21         |
| IV <sup>13</sup> C CPMAS of compound <b>5</b>                                                                         | S22         |
| V <sup>13</sup> C CPMAS of compound <b>6</b>                                                                          | S23         |
| VI Hydrogen-bonding and short intramolecular contact geometry in the crystal structures of compounds <b>1-8</b>       | S24-S25     |
| VII Figure depicting the C=O···Br and C–H···Br contacts in compound <b>7</b>                                          | S26         |

**General method for the synthesis of Schiff bases 1-8.** Equimolar quantities of the corresponding salicylaldehyde and aminoalcohol were dissolved in methanol (50 mL) and heated under reflux from 45 min to 1.5 hr, using a Dean-Stark trap, until formation of a solid precipitate or a turbidity of the solution. Then, the reaction mixtures were left to evaporate at ambient temperature and suitable crystals for X-ray diffraction were obtained.

**2,4-ditertbutyl-6-[(1-hydroxycyclohexylmethylimino)methyl]phenol (1).** The title compound was prepared from 3,5-ditertbutylsalicylaldehyde 0.50 g (2.13 mmol) and 1-aminomethyl-1-cyclohexanol hydrochloride 0.35 g (2.13 mmol) under reflux for 30 min, to give 0.68 g (1.96 mmol, 92% yield) of **1**. m.p.: 98-100 °C. IR (KBr)  $\nu_{\max}$ : 3438 (OH), 2958, 2935, 2866, 1628 (C=N), 1596, 1474, 1441, 974, 887, 852, 715  $\text{cm}^{-1}$ .  $^1\text{H}$  NMR ( $\text{CDCl}_3$ , 400 MHz)  $\delta$ : 13.59 (1H, br, OH), 8.37 (1H, s, H-8), 7.40 (1H, d,  $J = 2.3$  Hz, H-4), 7.11 (1H, d,  $J = 2.3$  Hz, H-6), 3.58 (2H, s,  $\text{CH}_2$ -10), 1.72-1.47 [10H, m,  $(-\text{CH}_2)_5$ ], 1.45 [9H, s,  $-\text{C}(\text{CH}_3)_3$ ], 1.31 [9H, s,  $-\text{C}(\text{CH}_3)_3$ ].  $^{13}\text{C}$  NMR ( $\text{CDCl}_3$ , 100 MHz)  $\delta$ : 168.1 (C-8), 158.2 (C-2), 140.3 (C-5), 136.8 (C-3), 127.2 (C-4), 126.2 (C-6), 117.9 (C-7), 71.6 (C-11), 70.4 (C-10), 35.9 (C-12 and C-16), 35.1 ( $-\text{C}(\text{CH}_3)_3$ ), 34.2 ( $-\text{C}(\text{CH}_3)_3$ ), 31.6 ( $-\text{C}(\text{CH}_3)_3$ ), 29.5 ( $-\text{C}(\text{CH}_3)_3$ ), 26.0 (C-14), 22.0 (C-13 and C-15). HR-APCI-MS:  $m/z$  for  $\text{C}_{22}\text{H}_{35}\text{NO}_2$   $[\text{M} + \text{H}]^+$  calc.: 346.2741, found: 346.2745.

**2,4-ditertbutyl-6-[(2-hydroxymethylphenylimino)methyl]phenol (2).** The title compound was prepared from 3,5-ditertbutylsalicylaldehyde 0.50 g (2.13 mmol) and 2-aminobenzylalcohol 0.26 g (2.13 mmol) under reflux for 1.5 h, to give 0.62 g (1.82 mmol, 86 %) of **2**. m.p.: 105-107 °C. IR (KBr)  $\nu_{\max}$ : 3315 (OH), 2956, 2868, 2355, 2350, 1614(C=N), 1569, 1464, 1436, 1360, 1247, 1168, 1038, 761  $\text{cm}^{-1}$ .  $^1\text{H}$  NMR ( $\text{CDCl}_3$ , 400 MHz)  $\delta$ : 13.42 (1H, br, OH), 8.64 (1H, s, H-8), 7.53 (1H, d,  $J = 7.4$  Hz, H-14), 7.50 (1H, d,  $J = 2.5$  Hz, H-6), 7.39 (1H, t,  $J = 7.5$  Hz, H-12), 7.31 (1H, t,  $J = 7.5$ , H-13), 7.27 (1H, d,  $J = 2.5$  Hz, H-4), 7.14 (1H, d,  $J = 7.5$  Hz, H-11), 4.90 (1H, s, H-16), 2.00 (1H, br, OH), 1.51 (9H, s,  $-\text{C}(\text{CH}_3)_3$ ), 1.36 (9H, s,  $-\text{C}(\text{CH}_3)_3$ );  $^{13}\text{C}$  NMR ( $\text{CDCl}_3$ , 100 MHz)  $\delta$ : 164.7 (C-8), 158.3 (C-2), 147.1 (C-10), 140.9 (C-5), 137.2 (C-3), 134.5 (C-15), 128.9 (C-12), 128.5 (C-6), 128.2 (C-14), 127.1 (C-4), 126.9 (C-13), 118.5 (C-7), 118.3 (C-11), 62.0 (C-16), 35.3 ( $-\text{C}(\text{CH}_3)_3$ ), 34.3 ( $-\text{C}(\text{CH}_3)_3$ ), 31.6 ( $-\text{C}(\text{CH}_3)_3$ ), 29.6 ( $-\text{C}(\text{CH}_3)_3$ ). HR-APCI-MS:  $m/z$  for  $\text{C}_{22}\text{H}_{30}\text{NO}_2$   $[\text{M} + \text{H}]^+$  calc.: 340.2271, found: 340.2275.

**(1R,2S)-2-[(2-hydroxy-1,2-diphenylethylimino)methyl]phenol (3).** The title compound was prepared from salicylaldehyde 0.15 g (1.23 mmol) and (1S,2R)-2-amino-1,2-diphenyletanol 0.26 g (1.23 mmol) under reflux for 45 min, to give 0.34 g (1.07 mmol, 87% yield) of **3**. m.p.: 129-131°C. IR

(KBr)  $\nu_{\max}$ : 3444 (OH), 3060, 3030, 2872, 1629 (C=N), 1579, 1497, 1454, 1425, 1277, 1054, 759, 710, 697  $\text{cm}^{-1}$ .  $^1\text{H}$  NMR ( $\text{CDCl}_3$ , 400 MHz)  $\delta$ : 13.18 (1H, br, OH), 8.08 (1H, s, H-8), 7.43-7.20 (11H, m, H-4, H-13-H-17 and H-19-H-23), 7.08 (1H, d,  $J = 7.4$  Hz, H-6), 6.95 (1H, d,  $J = 8.4$ , H-3), 6.82 (1H, t,  $J = 7.4$ , H-5), 5.04 (1H, d,  $J = 7.0$  Hz, H-11), 4.53 (1H, d,  $J = 7.0$  Hz, H-10), 2.20 (1H, br, OH).  $^{13}\text{C}$  NMR ( $\text{CDCl}_3$ , 100 MHz)  $\delta$ : 166.0 (C-8), 161.0 (C-2), 140.3 ( $\text{C}_i$ ), 139.6 ( $\text{C}_i$ ), 132.6 (C-4), 131.8 (C-6), 128.9 ( $\text{C}_{o-}$ ), 128.3 ( $\text{C}_{o-}$ ), 128.2 ( $\text{C}_p$ ), 128.1 ( $\text{C}_m$ ), 127.3 ( $\text{C}_m$ ), 118.8 (C-5), 118.7 (C-7), 117.0 (C-3), 80.2 (C-11), 78.4 (C-10). HR-APCI-MS:  $m/z$  for  $\text{C}_{21}\text{H}_{19}\text{NO}_2$   $[\text{M} + \text{H}]^+$  calc.: 318.1489, found: 318.1492.

**2-[(1-hydroxycyclohexyl)methylimino]methylphenol (4).** The title compound was prepared from salicylaldehyde 0.20 g (1.64 mmol) and 1-aminomethyl-1-cyclohexanol hydrochloride 0.27 g (1.64 mmol) under reflux for 30 min, to give 0.36 g (1.55 mmol, 95% yield) of **4**. m.p.: 156-158 °C. IR (KBr)  $\nu_{\max}$ : 3221 (NH), 3050, 2925, 2850, 1644 (C=O), 1611 (C=N), 1524, 1288, 1146, 912, 742  $\text{cm}^{-1}$ .  $^1\text{H}$  NMR ( $\text{CDCl}_3$ , 400 MHz)  $\delta$ : 13.41 (1H, br, OH), 8.35 (1H, s, H-8), 7.32-7.26 (2H, m, H-4 and H-6), 6.96-6.90 (1H, m, H-3), 6.89-6.86 (1H, m, H-5), 3.58 (2H, s,  $\text{CH}_2$ -10), 2.16 (1H, s, br, OH), 1.72-1.53 (8H, m,  $\text{CH}_2$ -12,  $\text{CH}_2$ -13,  $\text{CH}_2$ -15 and  $\text{CH}_2$ -16), 1.33-1.28 (2H, m,  $\text{CH}_2$ -14).  $^{13}\text{C}$  NMR ( $\text{CDCl}_3$ , 100 MHz)  $\delta$ : 166.9 (C-8), 161.3 (C-2), 132.5 (C-4), 131.5 (C-6), 118.9 (C-7), 118.7 (C-5), 117.2 (C-3), 71.5 (C-11), 70.2 (C-10), 35.8 (C-12 and C-16), 25.8 (C-14), 21.9 (C-13 and C-15). HR-APCI-MS:  $m/z$  for  $\text{C}_{14}\text{H}_{19}\text{NO}_2$   $[\text{M} + \text{H}]^+$  calc.: 234.1489, found: 234.1491.

**2-[1-(2-hydroxyethylimino)ethyl]phenol (5).** The title compound was prepared from 2'-hydroxyacetophenone 0.50 g (3.67 mmol) and ethanolamine 0.22 g (3.67 mmol) under reflux for 1 h, to give 0.63 g (3.52 mmol, 95% yield) of **5**. m.p.: 96-98 °C. IR (KBr)  $\nu_{\max}$ : 3170 (NH), 2923, 2866, 1607 (C=N), 1543, 1459, 1340, 1068, 772, 754  $\text{cm}^{-1}$ .  $^1\text{H}$  NMR ( $\text{CDCl}_3$ , 400 MHz)  $\delta$ : 16.75 (1H, br, OH), 7.30 (1H, d,  $J = 8.1$  Hz, H-6), 7.20 (1H, t,  $J = 7.2$  Hz, H-4), 6.79 (1H, d,  $J = 8.1$ , H-3), 6.60 (1H, t, 7.2 Hz, H-5), 4.66 (1H, b, OH), 3.90 (2H, t,  $J = 5.1$  Hz,  $-\text{CH}_2\text{-O-}$ ), 3.63 (2H, t,  $J = 5.1$  Hz, N- $\text{CH}_2$ -), 2.22 (3H, s,  $\text{CH}_3$ -8).  $^{13}\text{C}$  NMR ( $\text{CDCl}_3$ , 100 MHz)  $\delta$ : 173.7 (C-8), 166.9 (C-2), 133.4 (C-6), 128.5 (C-4), 119.9 (C-5), 118.2 (C-7), 116.1 (C-3), 61.6 ( $-\text{CH}_2\text{-O-}$ ), 50.6 (N- $\text{CH}_2$ -), 14.5 ( $\text{CH}_3$ ). HR-APCI-MS:  $m/z$  for  $\text{C}_{10}\text{H}_{13}\text{NO}_2$   $[\text{M} + \text{H}]^+$  calc.: 180.1019, found: 180.1023.

**2-[(1S,2R)-1-hydroxy-1-phenylpropan-2-ylimino]methyl-4-nitrophenol (6).** The title compound was prepared from 2-hydroxy-5-nitrosalicylaldehyde 0.50 g (2.99 mmol) and (1S,2R)-norephedrine 0.45 g

(2.99 mmol) under reflux for 1 h, to give 0.79 g (2.64 mmol, 88% yield) of **6**. m.p.: 169-171 °C. IR (KBr)  $\nu_{\max}$ : 3413 (O-H), 3257 (N-H), 3067, 2986, 1657 (C=O), 1612 (C=N), 1547, 1332, 1300, 1233, 702, 754  $\text{cm}^{-1}$ .  $^1\text{H}$  NMR ( $\text{CDCl}_3$ , 500 MHz)  $\delta$ : 14.55 (1H, br, OH), 8.19 (1H, d,  $J = 4.54$  Hz, H-8), 8.18-8.15 (2H, m, H-4 and H-6), 7.38-7.25 (5H, m, H-13-H-17), 6.90-6.83 (1H, m, H-3), 4.85 (1H, d,  $J = 5.02$  Hz, H-11), 3.86-3.80 (1H, m, H-10), 2.48 (1H, br, OH), 1.35 (3H, d,  $J = 6.21$  Hz,  $\text{CH}_3$ -10).  $^{13}\text{C}$  NMR ( $\text{CDCl}_3$ , 125 MHz)  $\delta$ : 170.8 (C-2), 163.8 (C-8), 140.0 (C-5), 138.3 (C-12), 129.1 (C-4), 128.7 (C-6), 128.6 (C-13 and C-17), 128.5 (C-15), 126.8 (C-14 and C-16), 119.8 (C-3), 116.1 (C-7), 77.0 (C-11), 67.7 (C-10), 17.2 ( $\text{CH}_3$ ). HR-APCI-MS:  $m/z$  for  $\text{C}_{16}\text{H}_{17}\text{N}_2\text{O}_4$  [ $\text{M} + \text{H}$ ] $^+$  calc.: 301.1183, found: 301.1186.

**2-[(1S,2R)-1-hydroxy-1-phenylpropan-2-ylimino]methyl]-4-bromophenol (7)**. The title compound was prepared from 5-bromosalicylaldehyde 0.33 g (1.65 mmol) and (1S,2R)-norephedrine 0.25 g (1.65 mmol) under reflux for 2 h, to give 0.45 g (1.47 mmol, 85% yield) of **7**. m.p.: 106-108 °C. IR (KBr)  $\nu_{\max}$ : 3053 (NH), 2975, 2849, 1645 (C=O), 1602 (C=N), 1495, 831, 750, 703  $\text{cm}^{-1}$ .  $^1\text{H}$  NMR ( $\text{CDCl}_3$ , 400 MHz)  $\delta$ : 13.33 (1H, br, OH), 8.09 (1H, s, H-8), 7.40-7.25 (7H, m, H-4, H-6 and H-13-H-17), 6.80 (1H, d,  $J = 8.8$  Hz, H-3), 4.74 (1H, d,  $J = 5.6$  Hz, H-11), 3.64 (1H, quint,  $J = 6.3$  Hz, H-10), 2.56 (1H, br, OH), 1.29 (3H, d,  $J = 6.3$ ,  $\text{CH}_3$ -10).  $^{13}\text{C}$  NMR ( $\text{CDCl}_3$ , 100 MHz)  $\delta$ : 163.4 (C-8), 160.6 (C-2), 140.8 (C-12), 135.1 (C-4), 133.6 (C-6), 128.4 (C-13 and C-17), 128.1 (C-15), 127.0 (C-14 and C-16), 120.0 (C-7), 119.2 (C-3), 110.0 (C-5), 77.6 (C-11), 69.9 (C-10), 18.1 ( $\text{CH}_3$ ). HR-APCI-MS:  $m/z$  for  $\text{C}_{16}\text{H}_{16}\text{BrNO}_2$  [ $\text{M} + \text{H}$ ] $^+$  calc.: 334.0437, found: 334.0433.

**2-[(4-Chloro-2-hydroxymethylphenylimino)methyl]-5-diethylaminophenol (8)**. The title compound was prepared from 4-diethylaminosalicylaldehyde 1.00 g (5.17 mmol) and 2-amino-5-chlorobenzyl alcohol 0.82 g (5.17 mmol) under reflux of methanol for 2.0 h, to give 1.60 g (4.8 mmol, 93% yield) of **8**. m.p.: 115-117 °C. IR (KBr)  $\nu_{\max}$ : 3212 (OH, NH), 2971, 1610 (C=O, C=N), 1520, 1345, 1241, 1132, 1044, 785  $\text{cm}^{-1}$ .  $^1\text{H}$  NMR ( $\text{CDCl}_3$ , 400 MHz)  $\delta$ : 13.63 (1H, br, OH), 8.28 (1H, s, H-8), 7.46 (1H, d,  $J = 2.3$  Hz, H-14), 7.22 (1H, dd,  $J = 8.6, 2.3$  Hz, H-12), 7.12 (1H, d, 8.8 Hz, H-6), 7.00 (1H, d,  $J = 8.6$  Hz, H-11), 6.22 (1H, dd,  $J = 8.8, 2.3$  Hz, H-5), 6.12 (1H, d,  $J = 2.3$  Hz, H-3), 4.79 (2H, s,  $-\text{CH}_2\text{-O}$ ), 3.38 (4H, q,  $J = 7.0$  Hz,  $\text{N-CH}_2$ -), 3.0 (1H, b, OH), 1.19 (6H, t,  $J = 7.0$  Hz,  $-\text{CH}_3$ ).  $^{13}\text{C}$  NMR ( $\text{CDCl}_3$ , 100 MHz)  $\delta$ : 164.6 (C-2), 160.5 (C-8), 152.5 (C-4), 144.8 (C-10), 136.0 (C-15), 134.2 (C-6), 131.0 (C-13), 128.3 (C-14), 127.9 (C-12), 118.7 (C-11), 109.1 (C-7), 104.3 (C-5), 97.8 (C-3), 61.5 (C-16), 44.8 ( $\text{N-CH}_2$ -), 12.8 ( $-\text{CH}_3$ ). HR-APCI-MS:  $m/z$  for  $\text{C}_{18}\text{H}_{21}\text{ClN}_2\text{O}_2$  [ $\text{M} + \text{H}$ ] $^+$  calc.: 333.1364, found: 333.1365



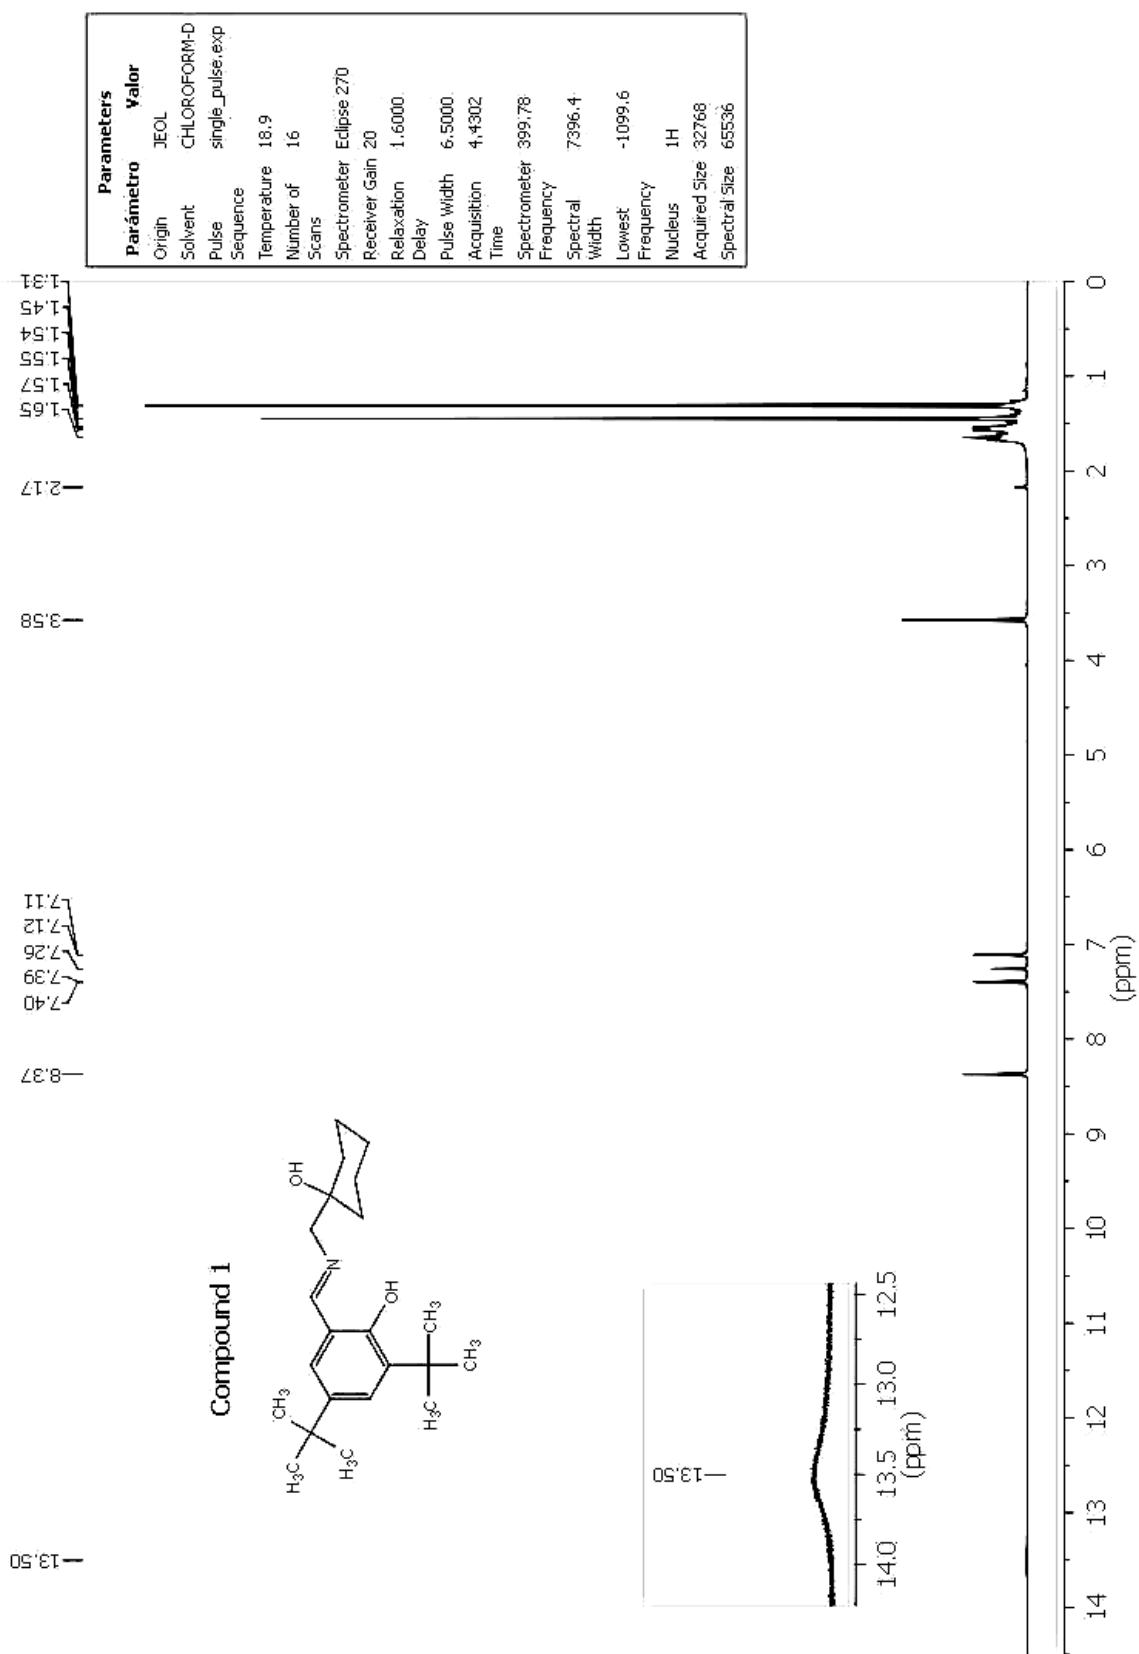



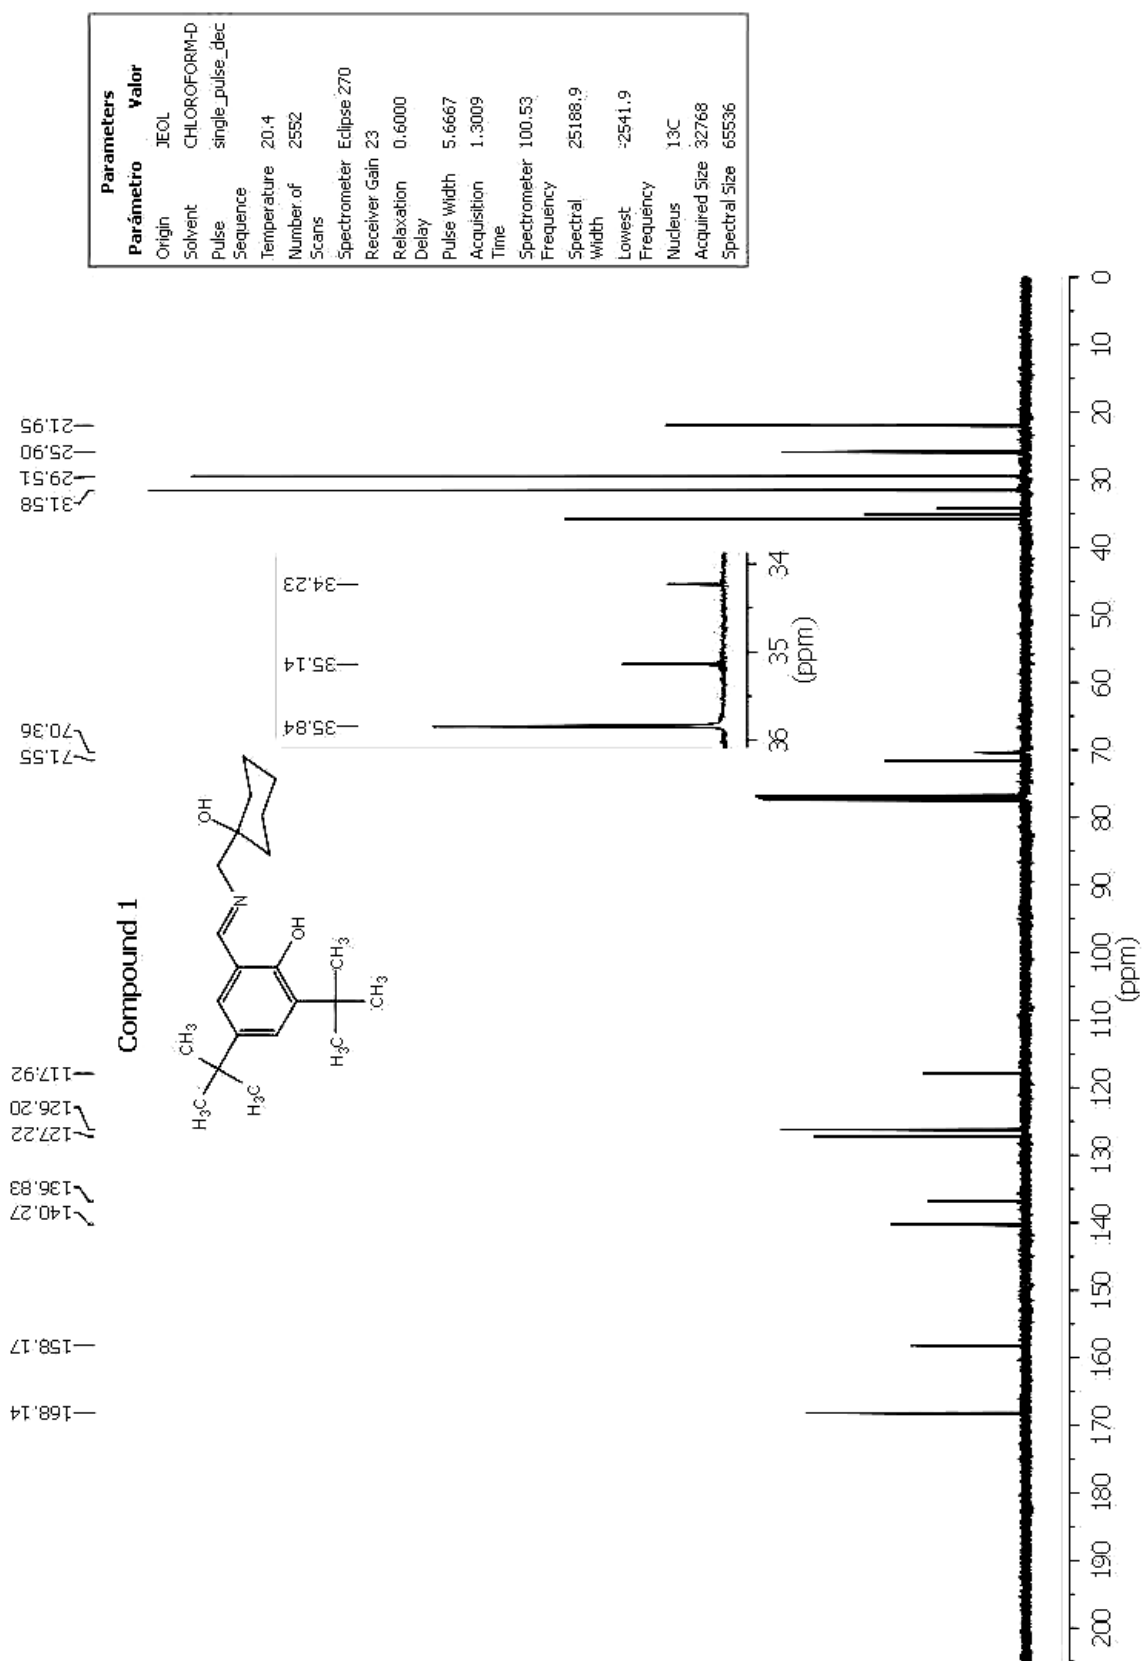





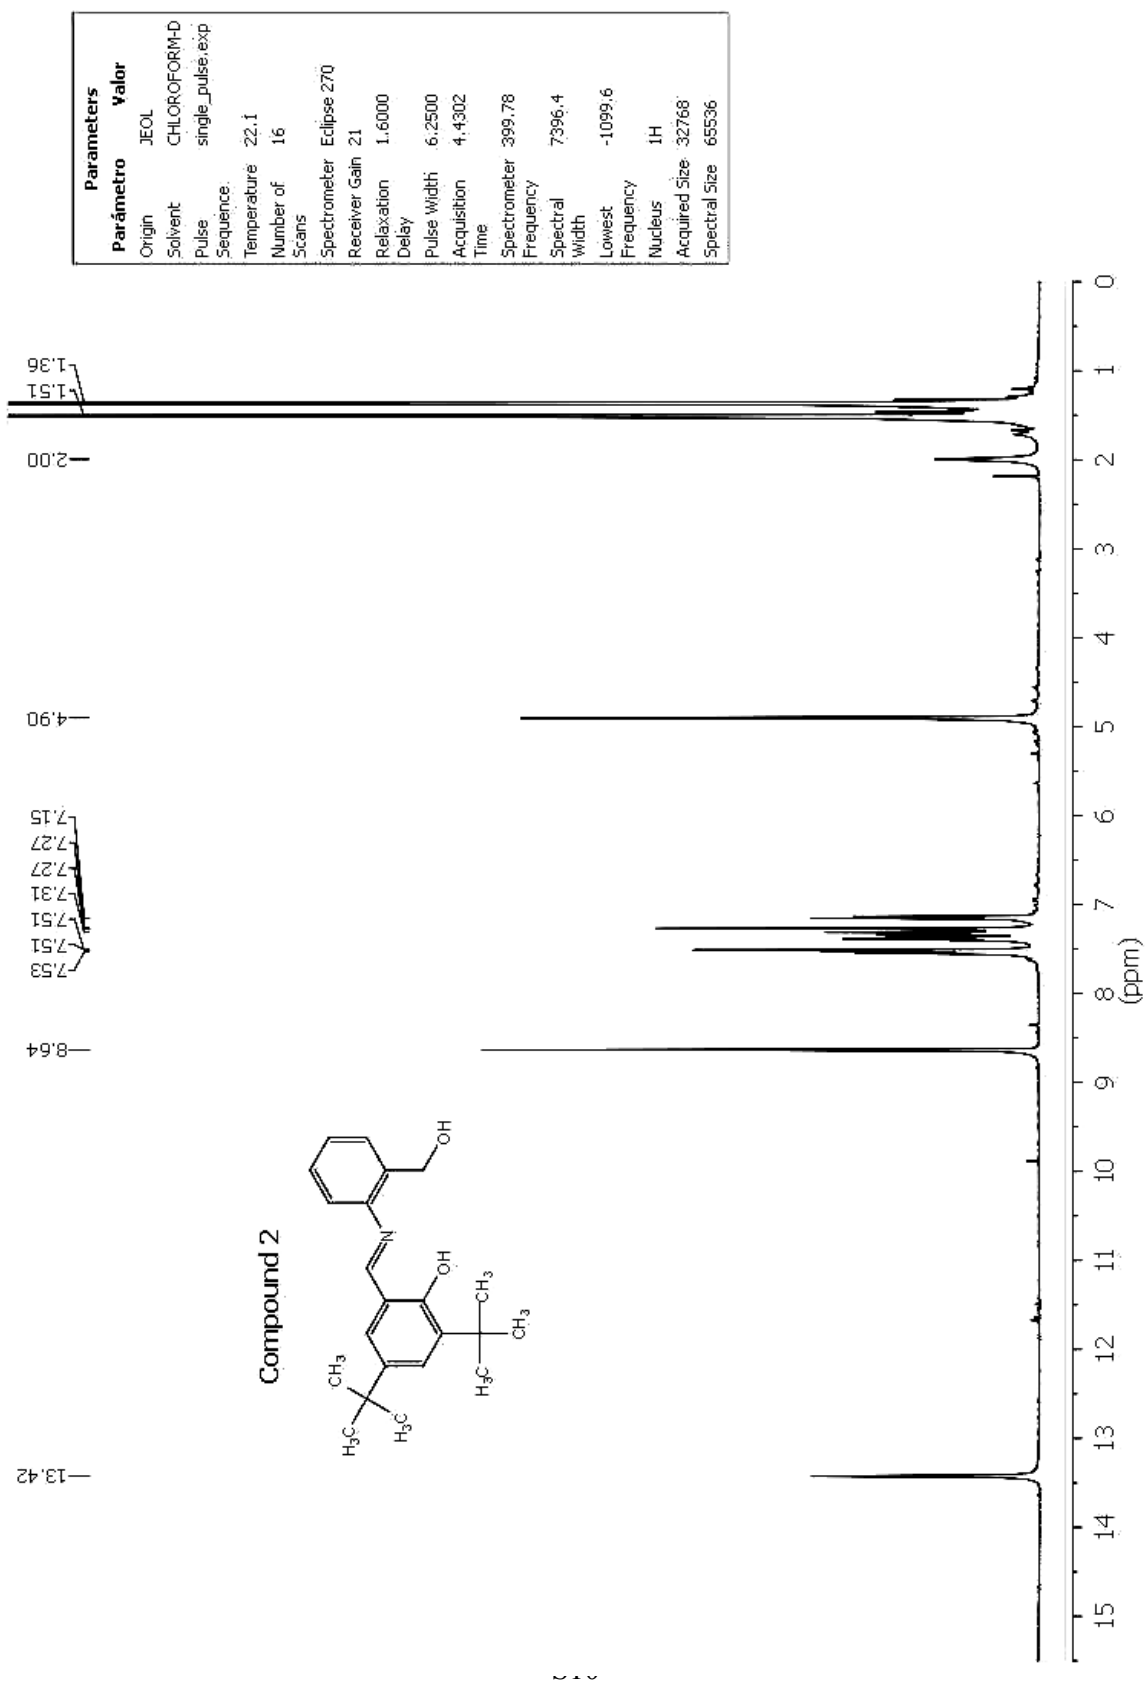



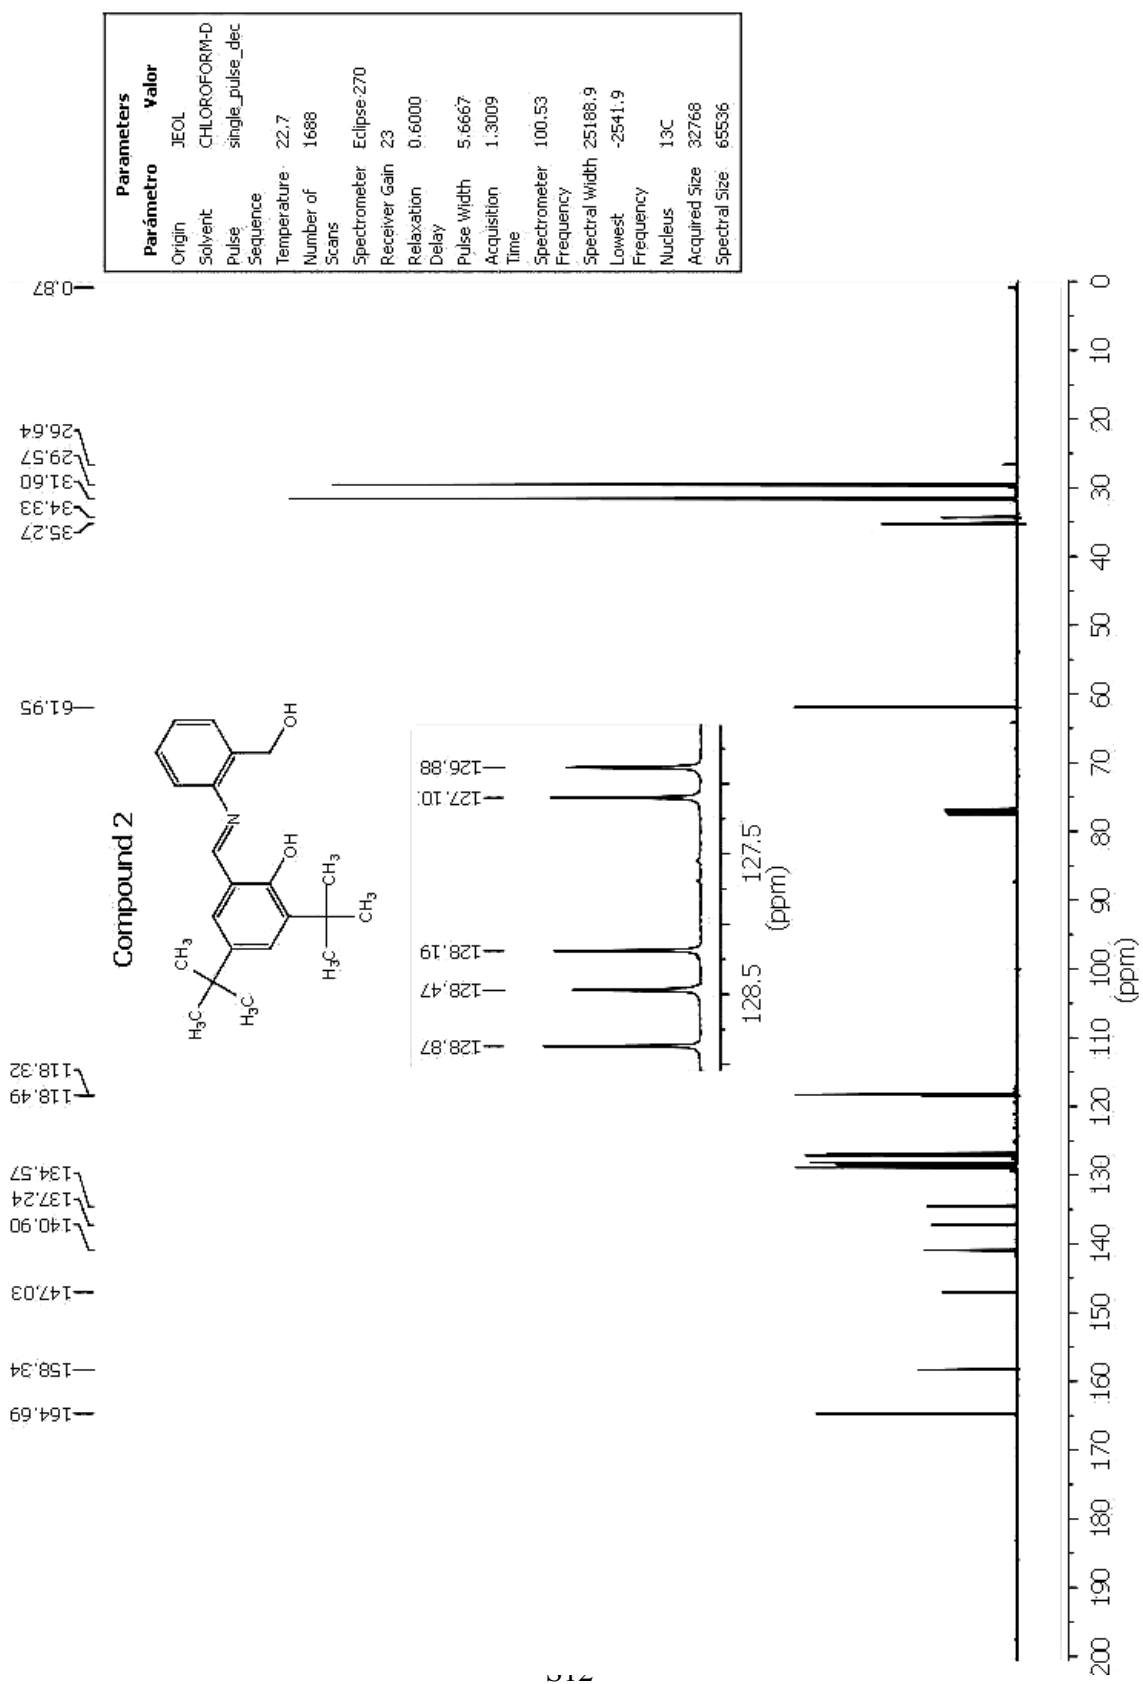



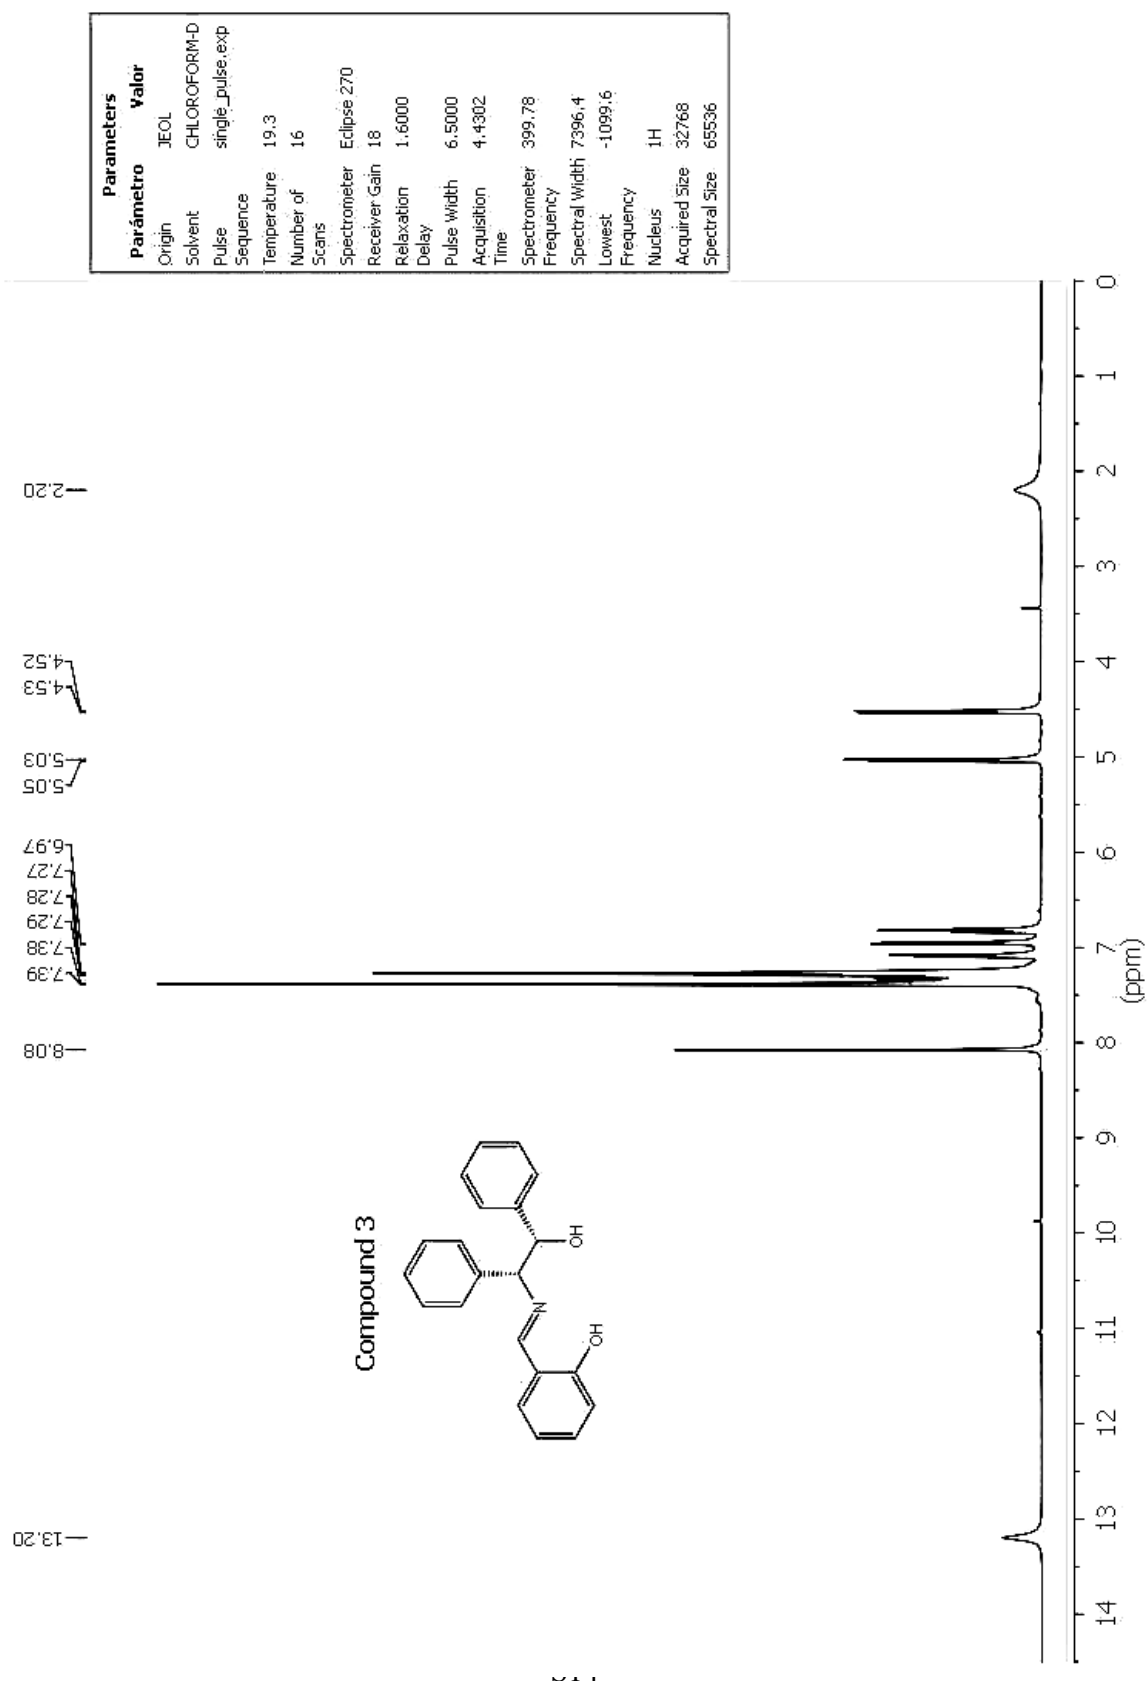



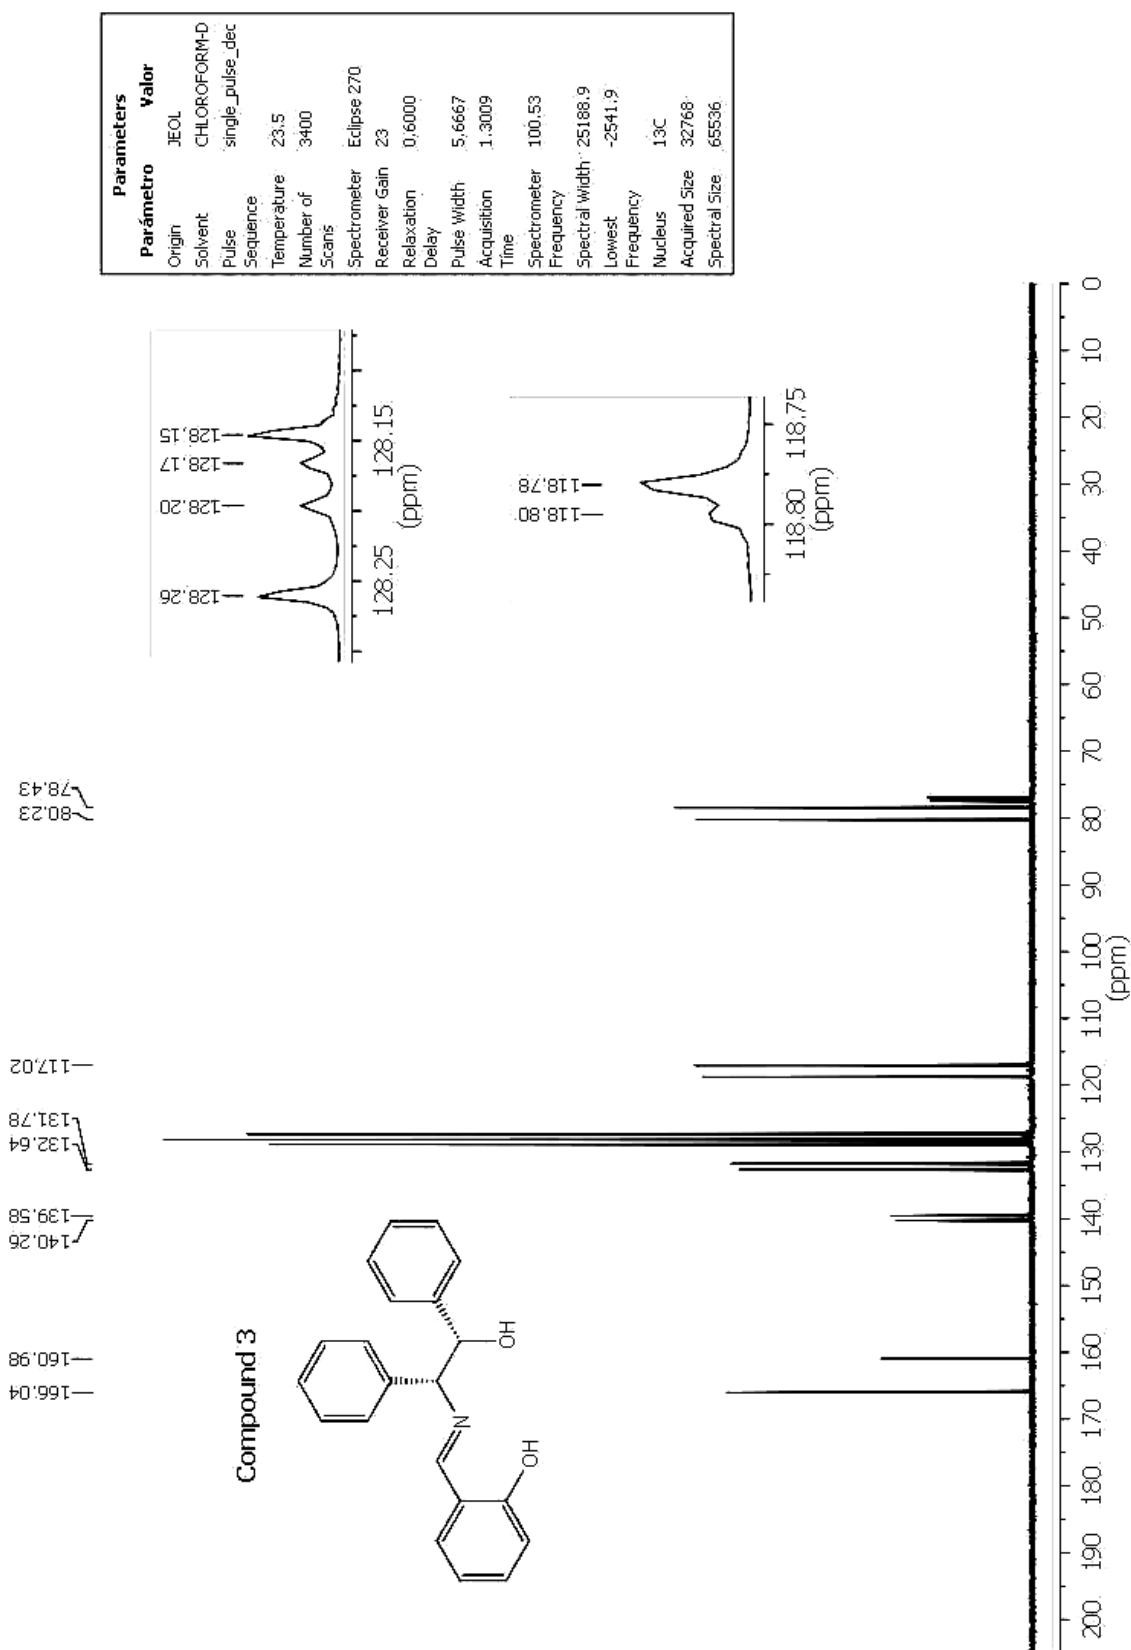





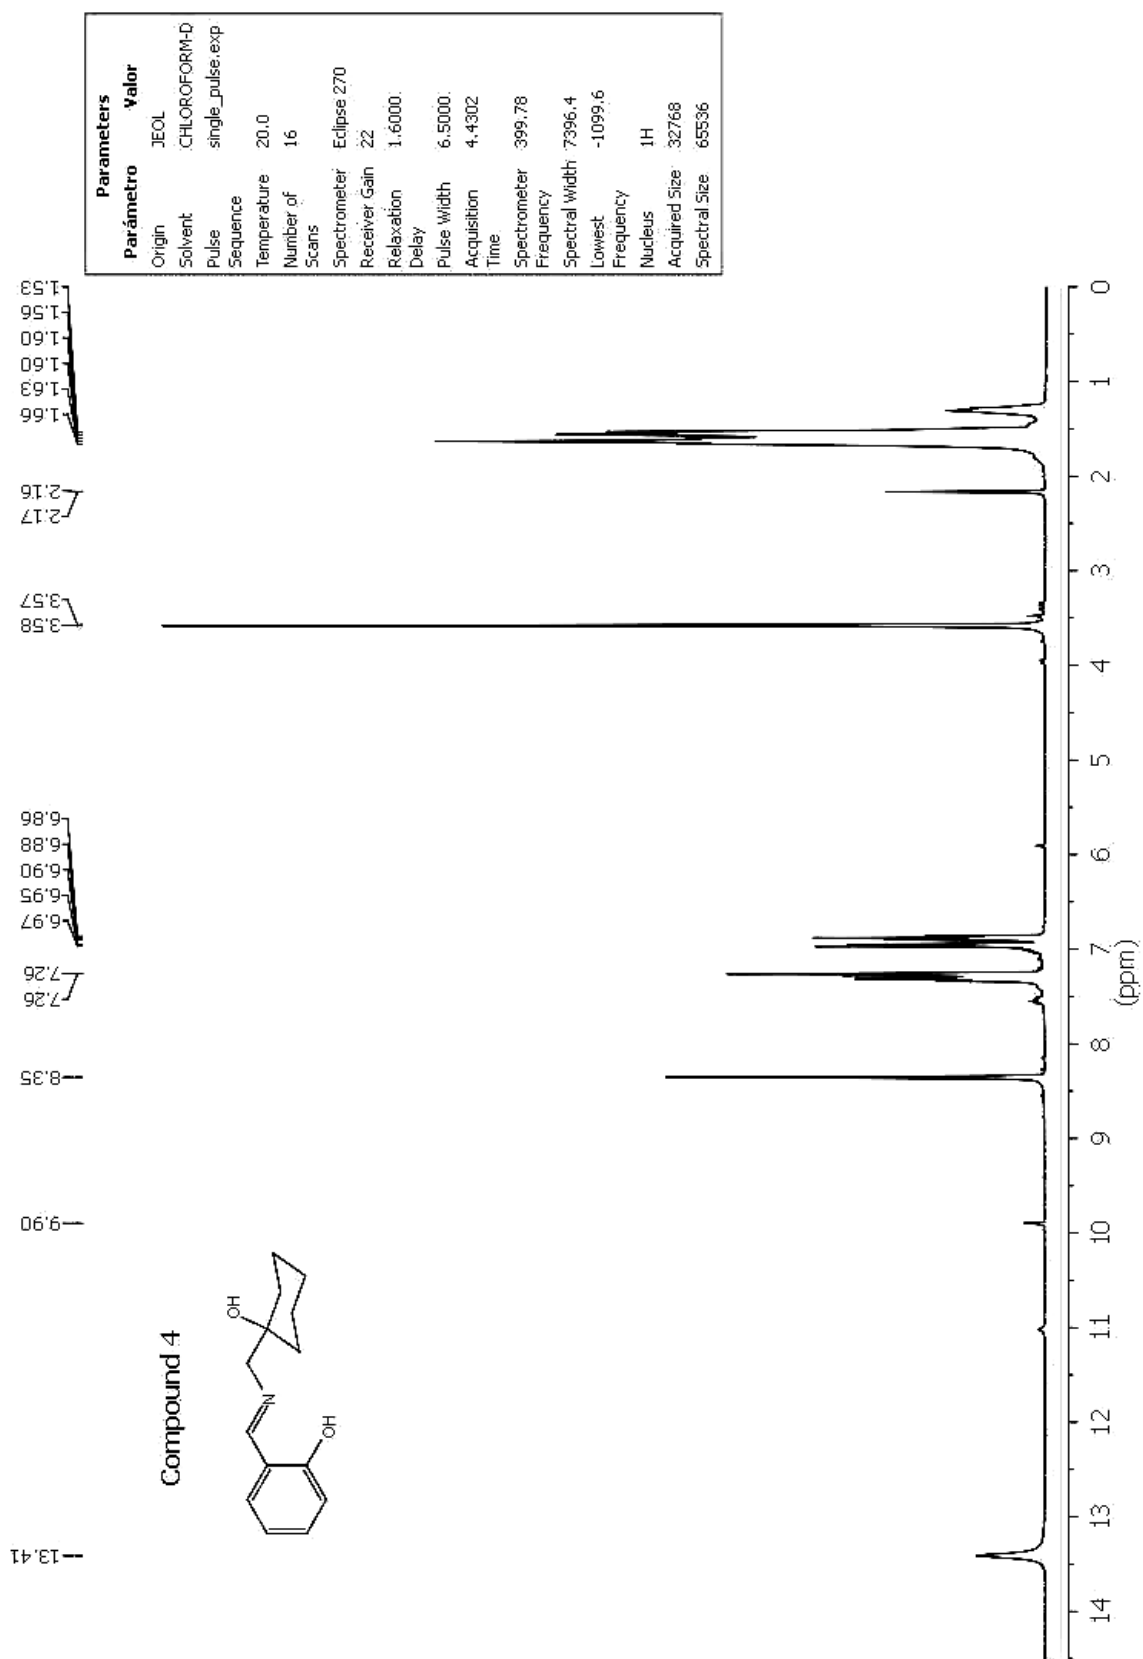



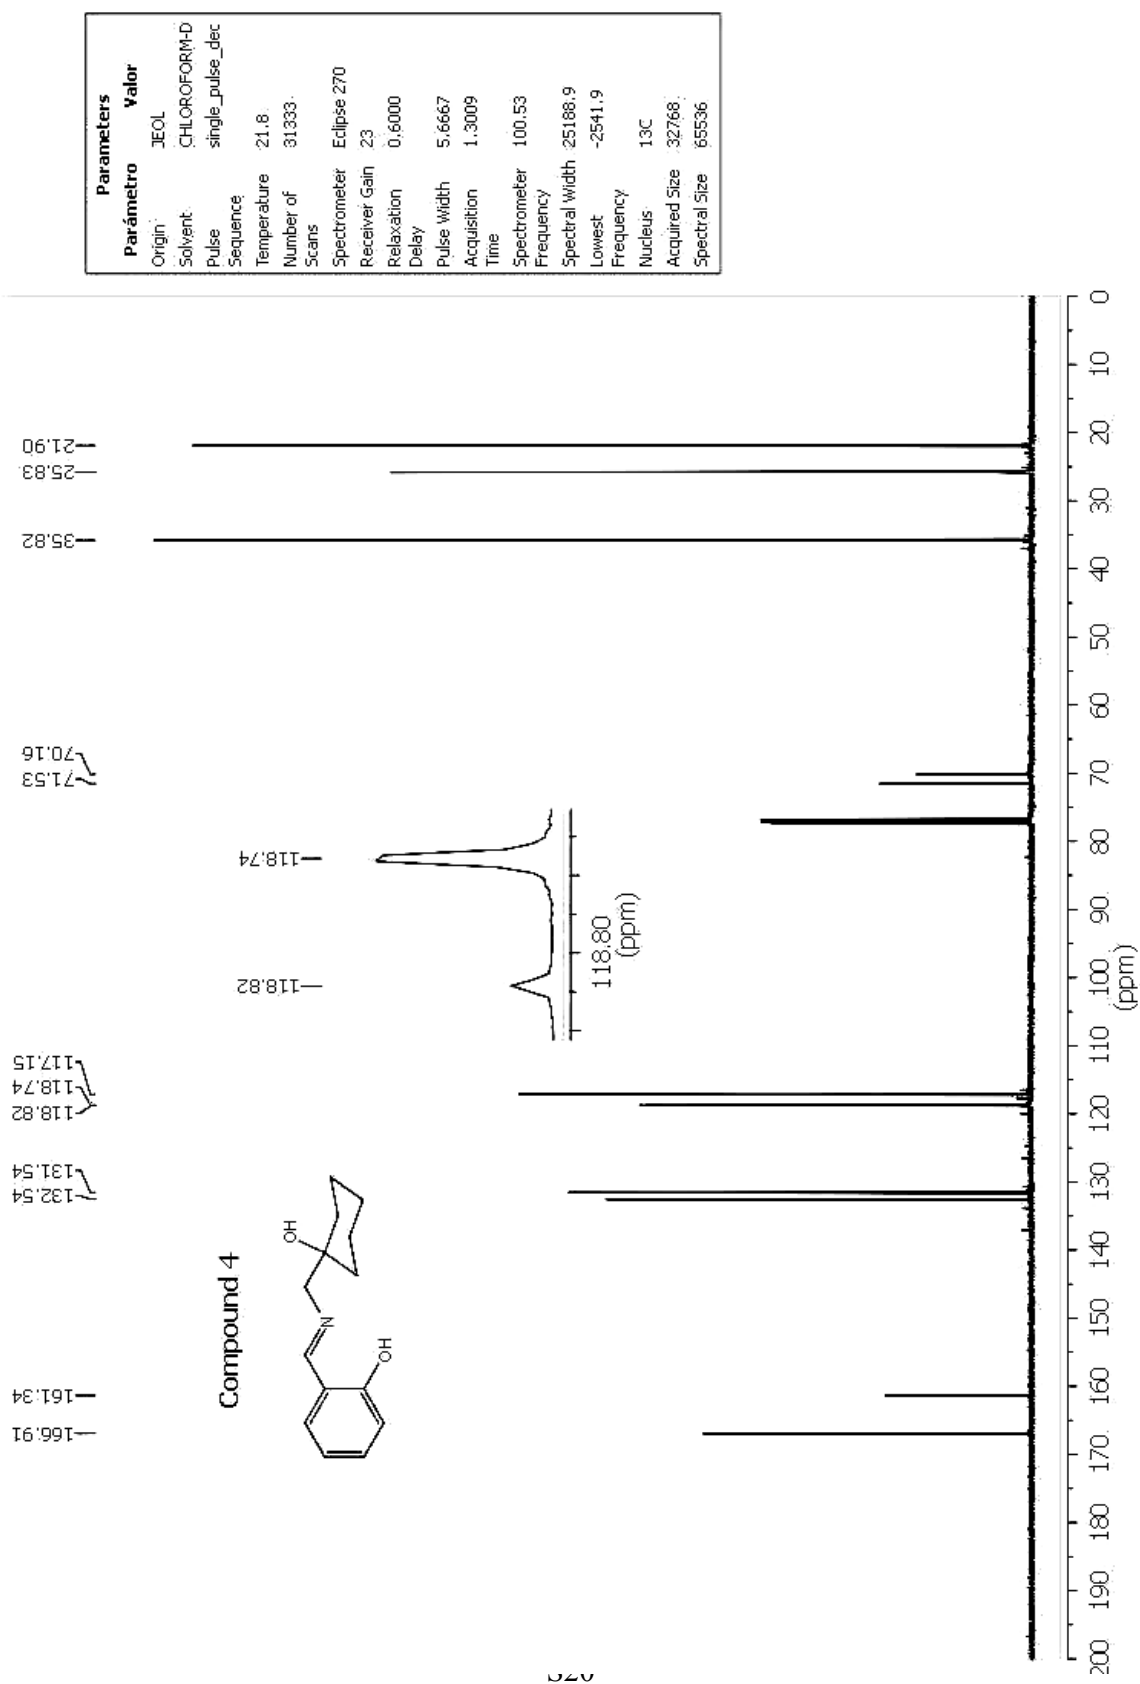



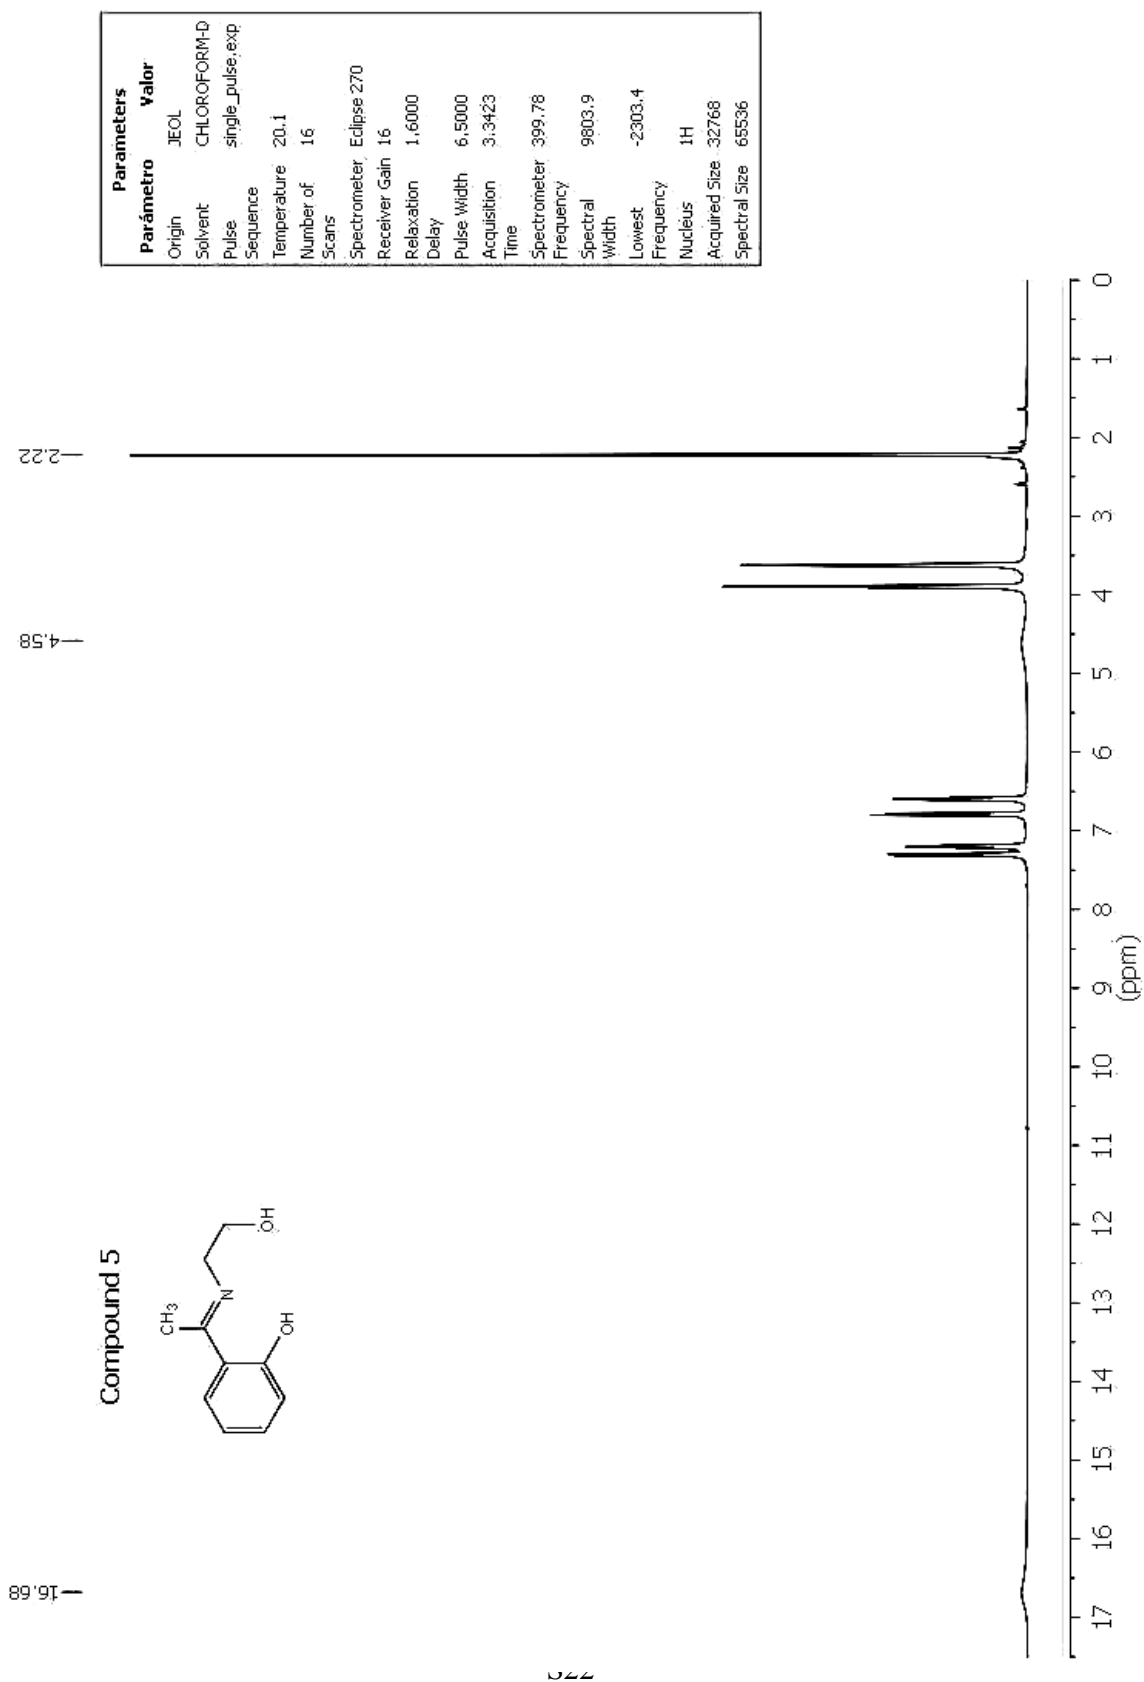



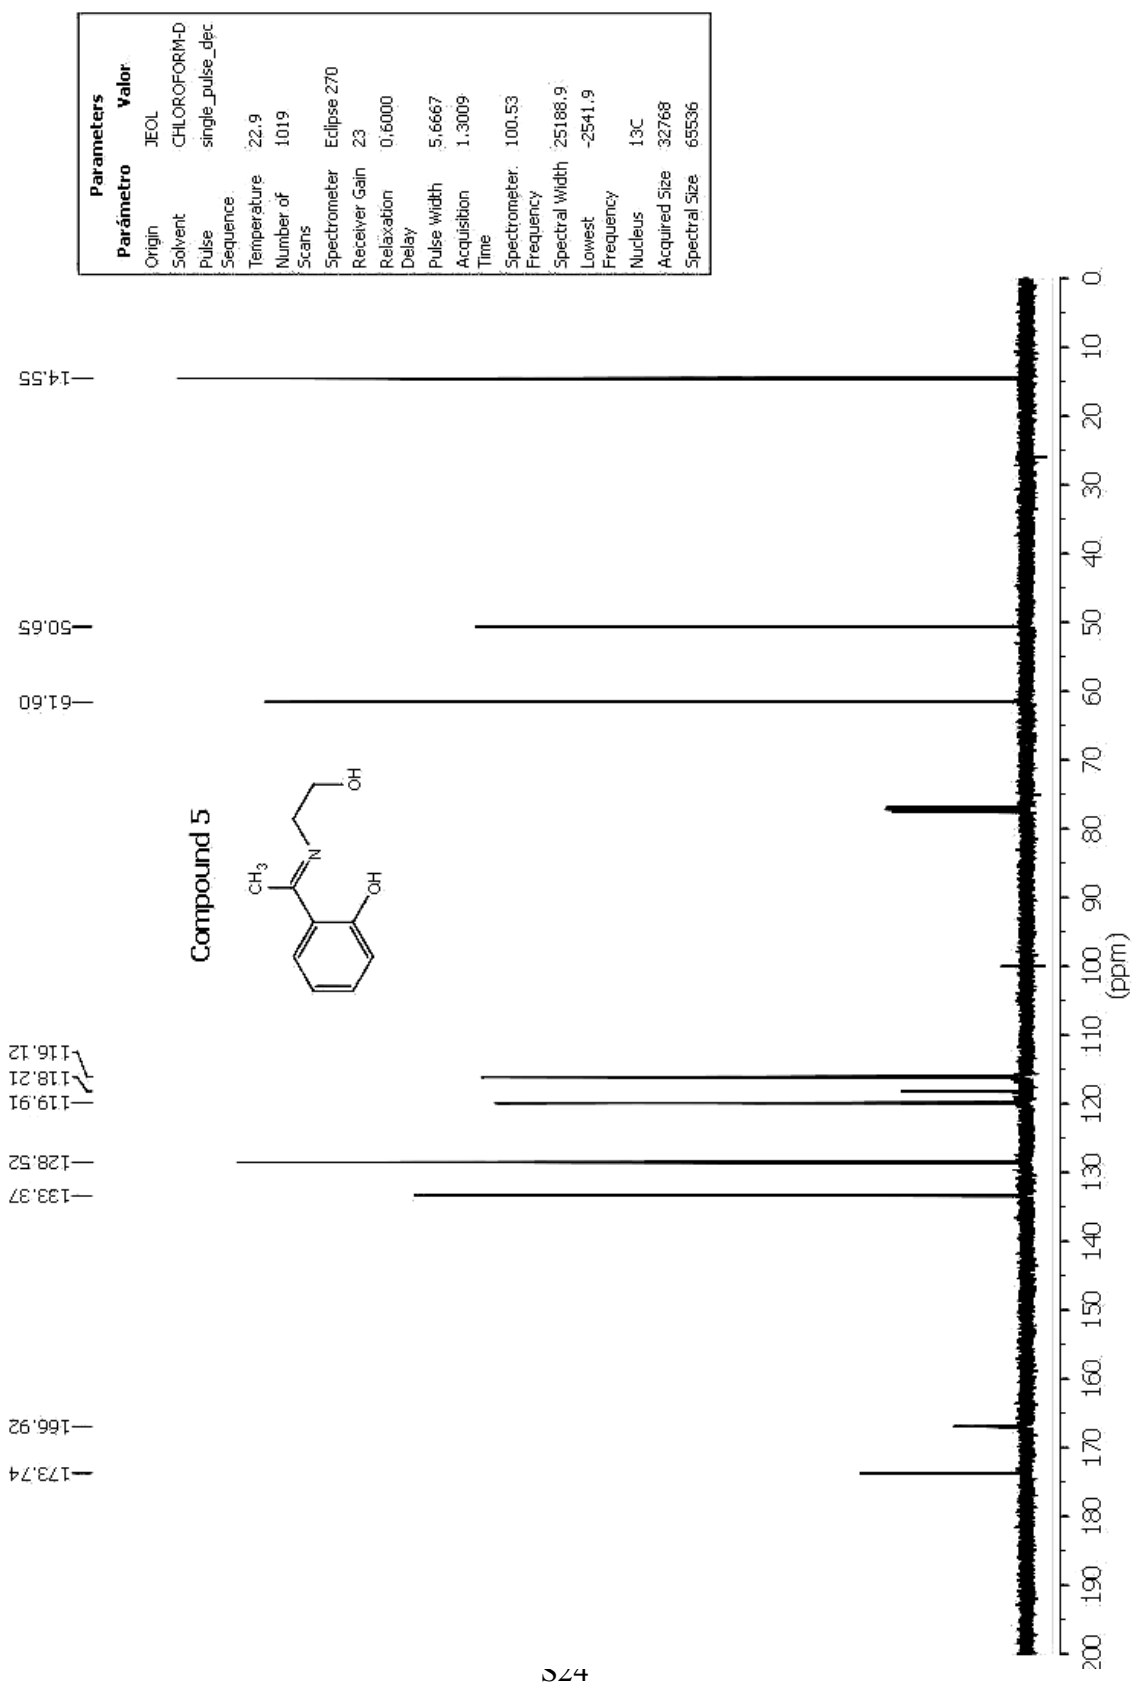





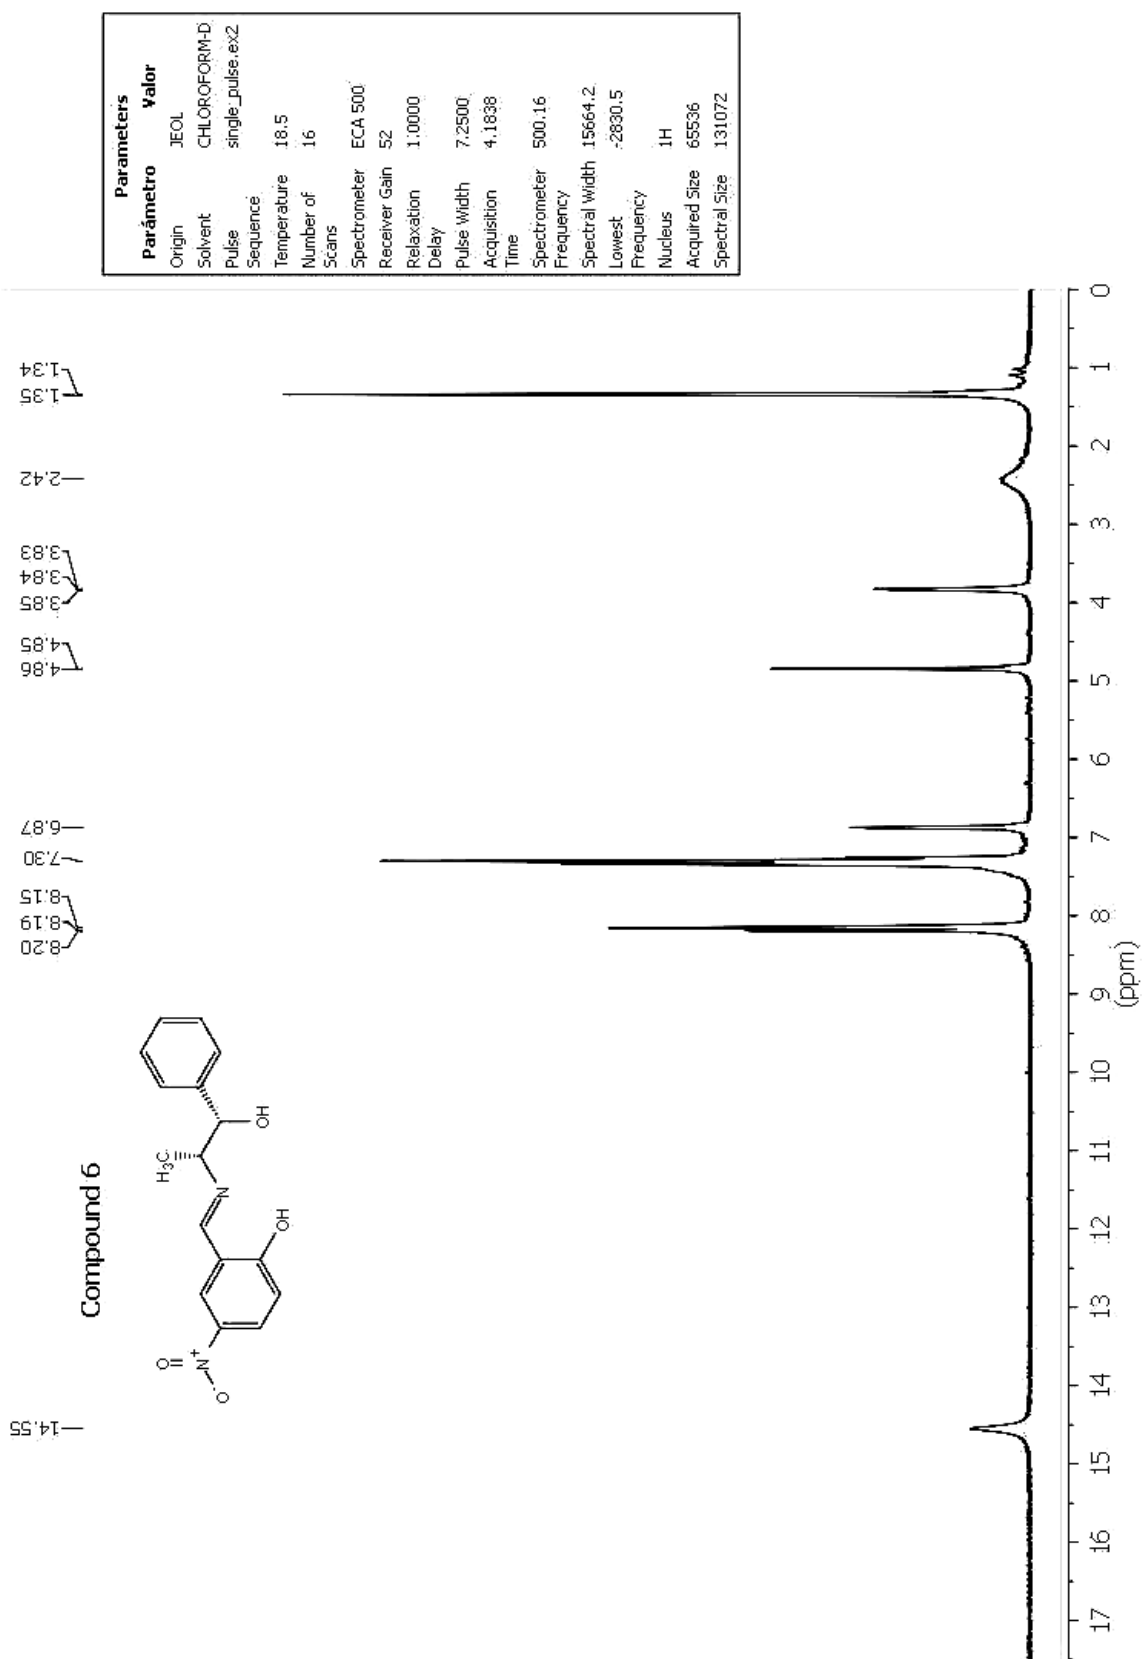



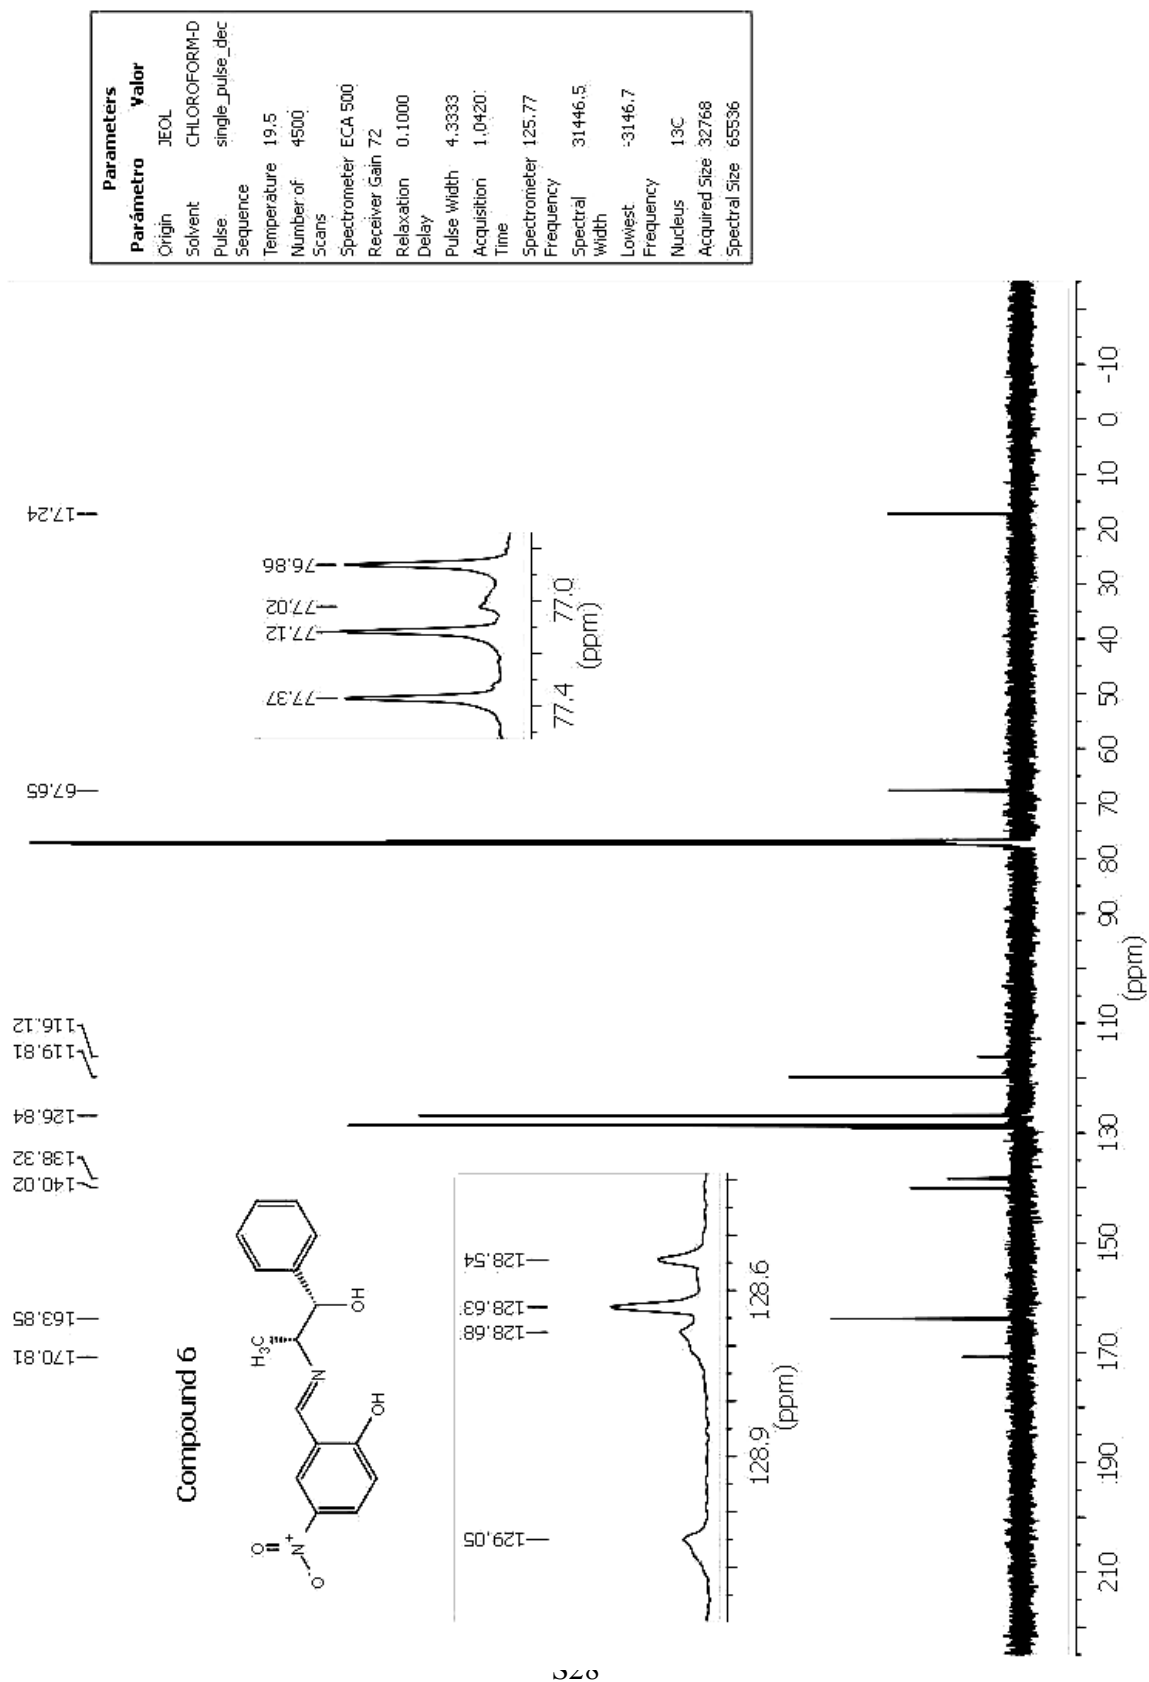



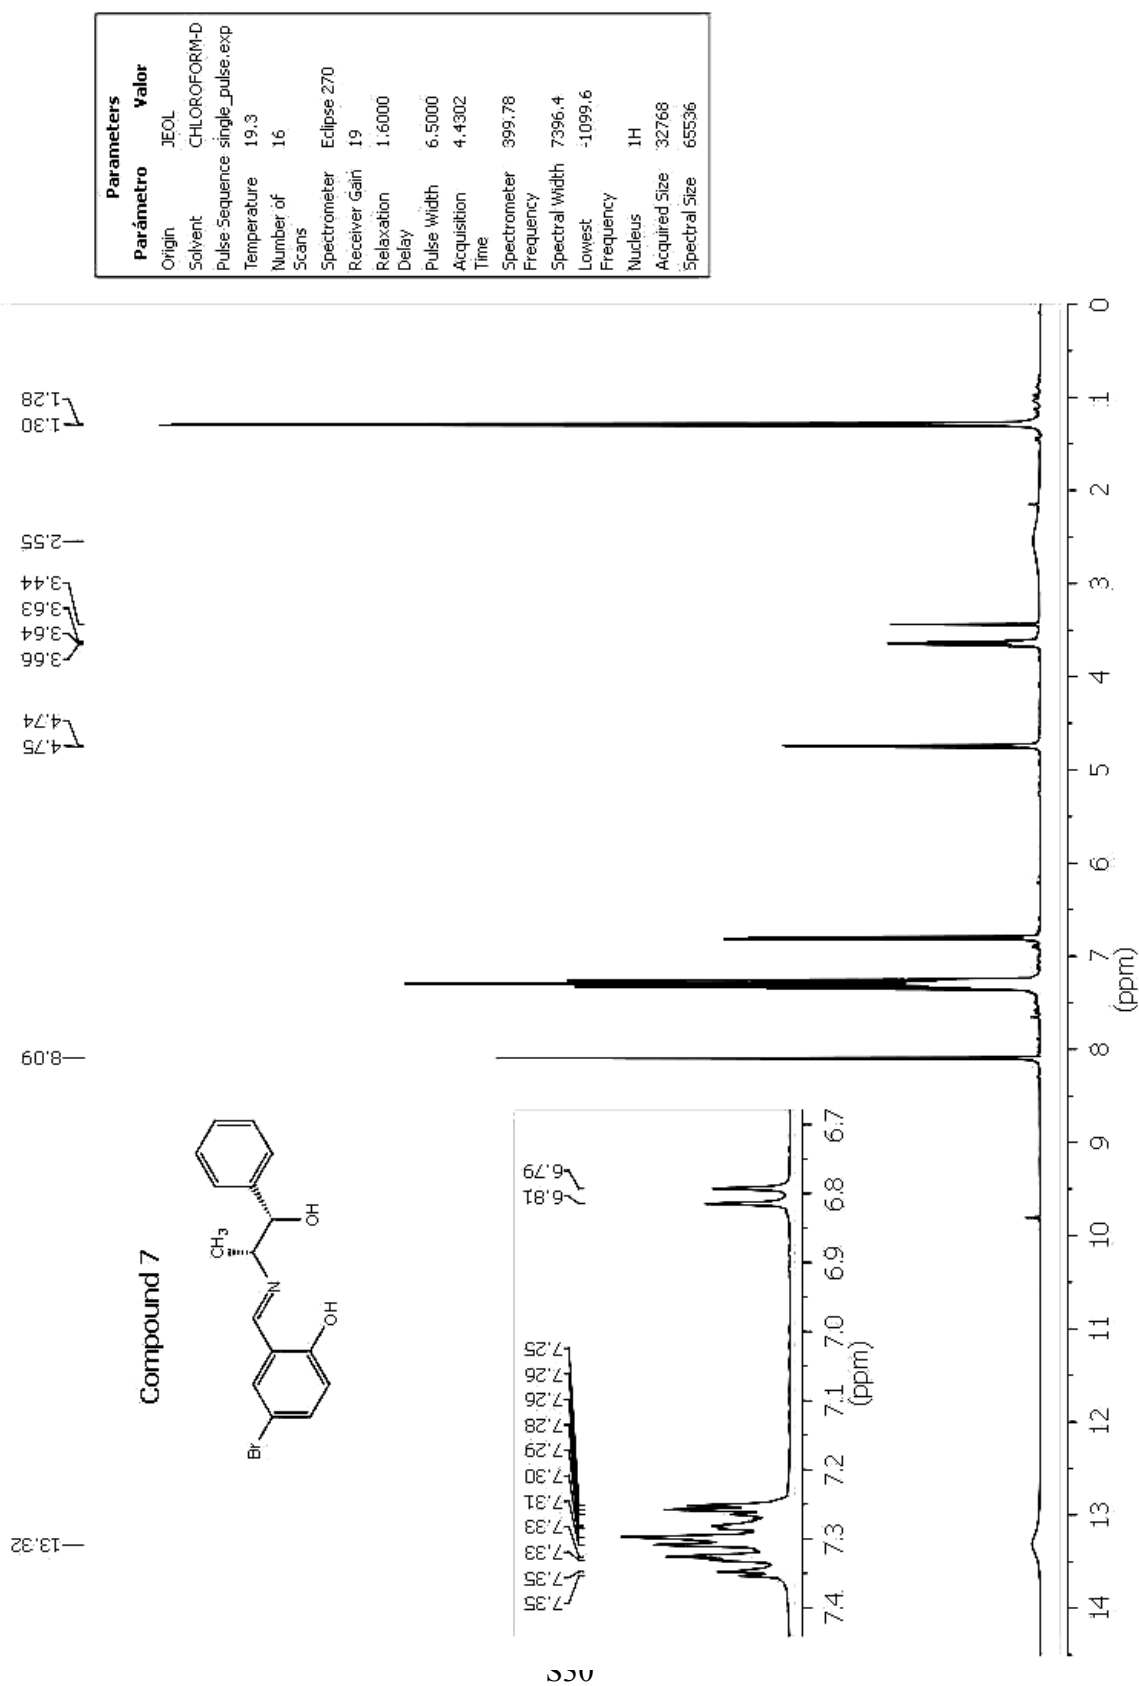



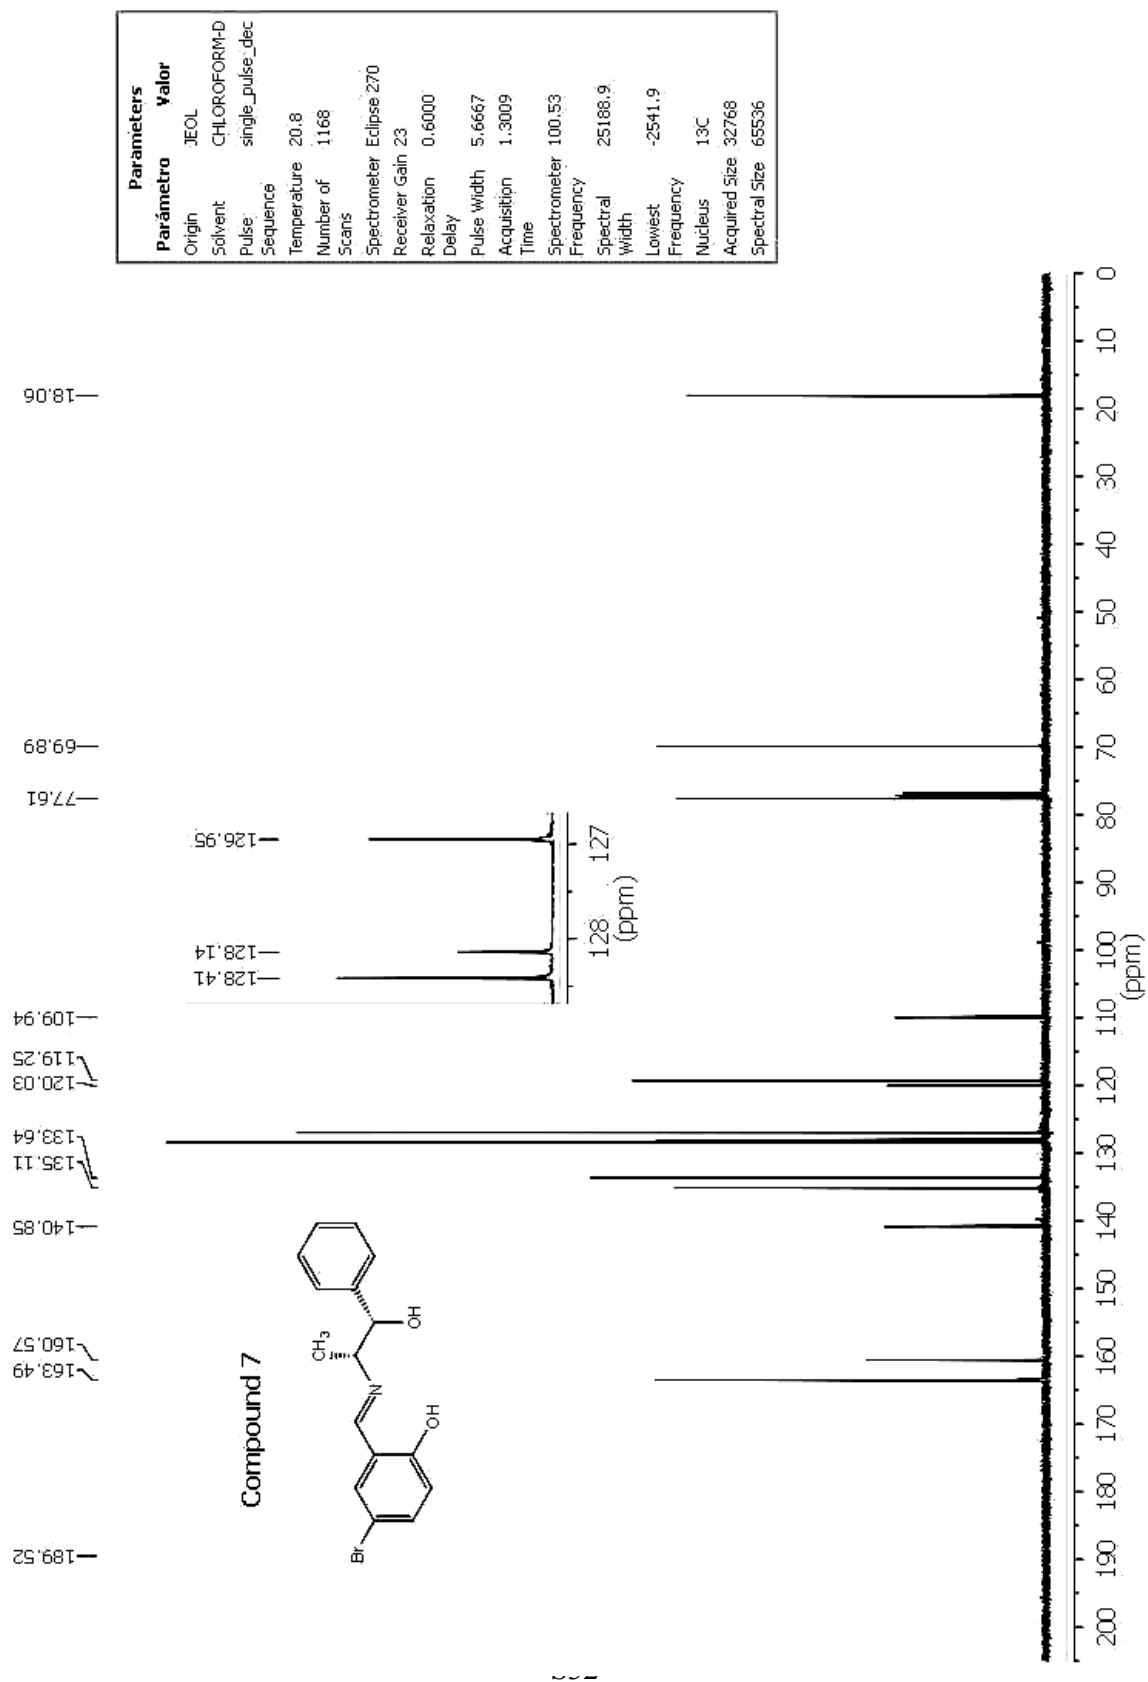





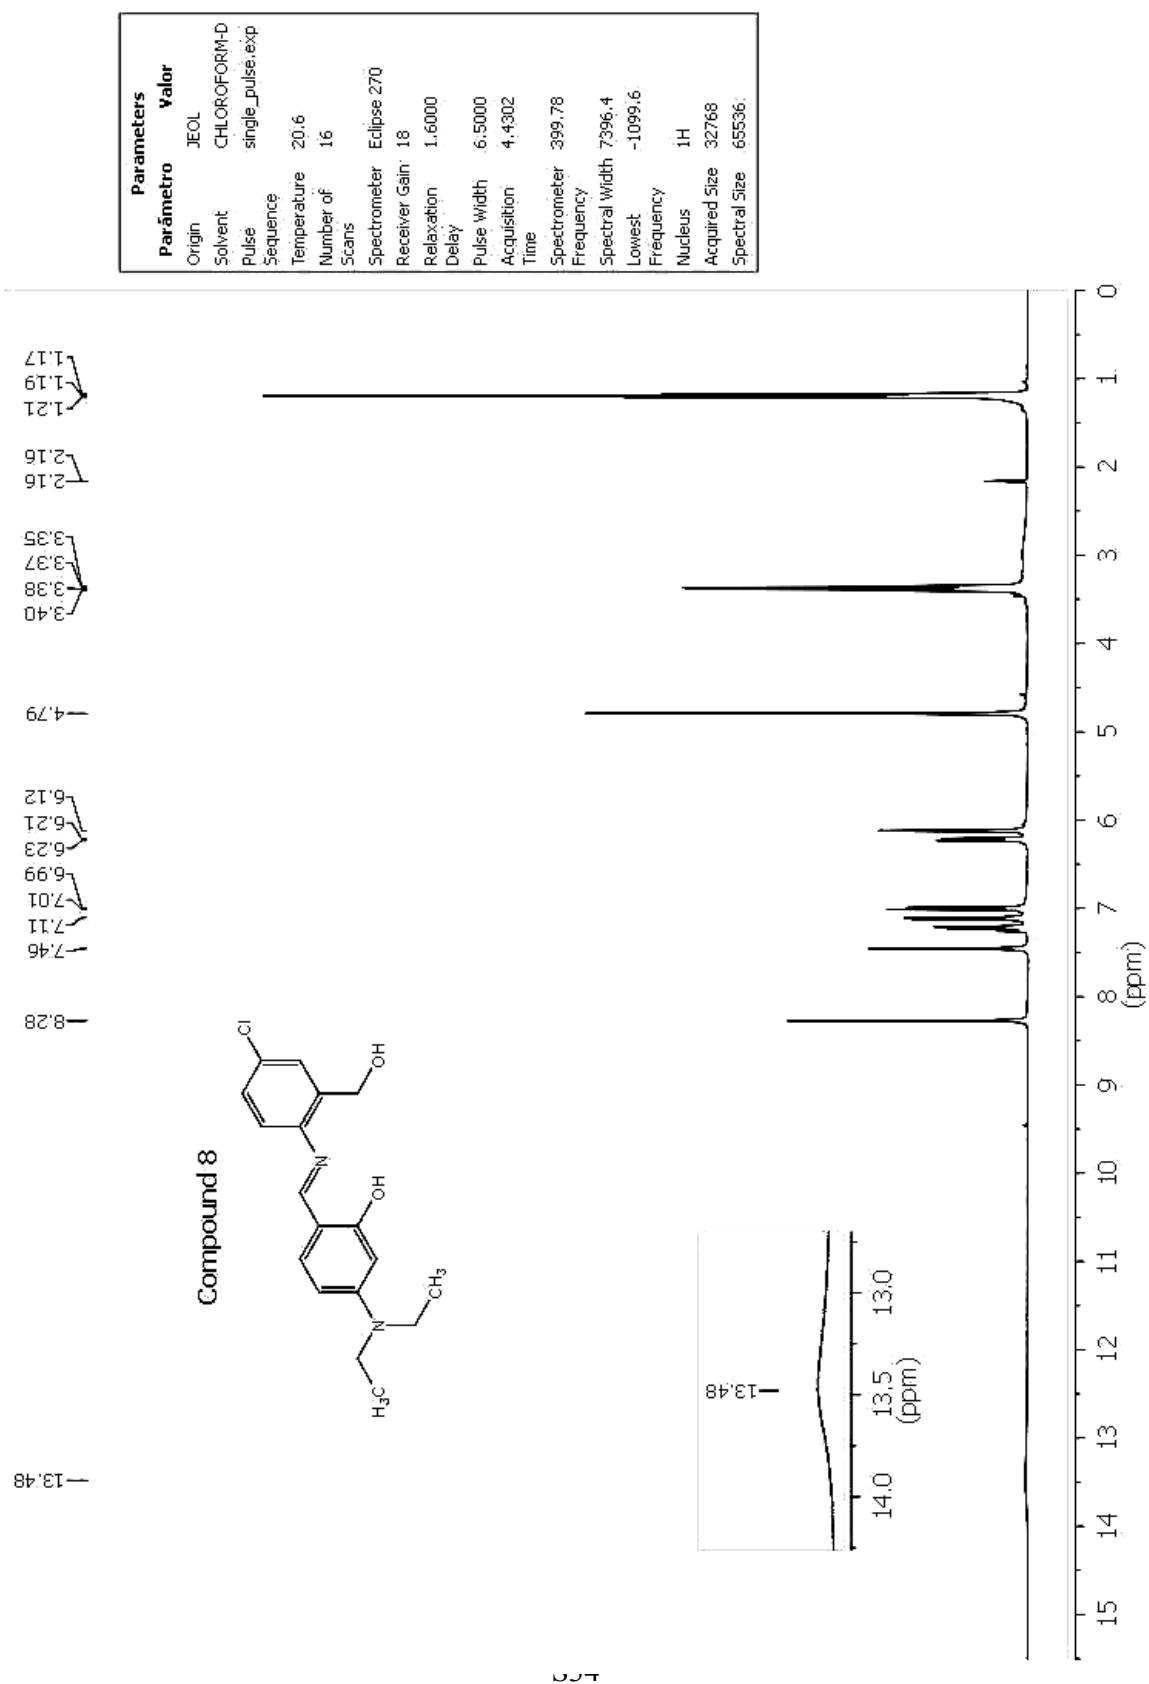



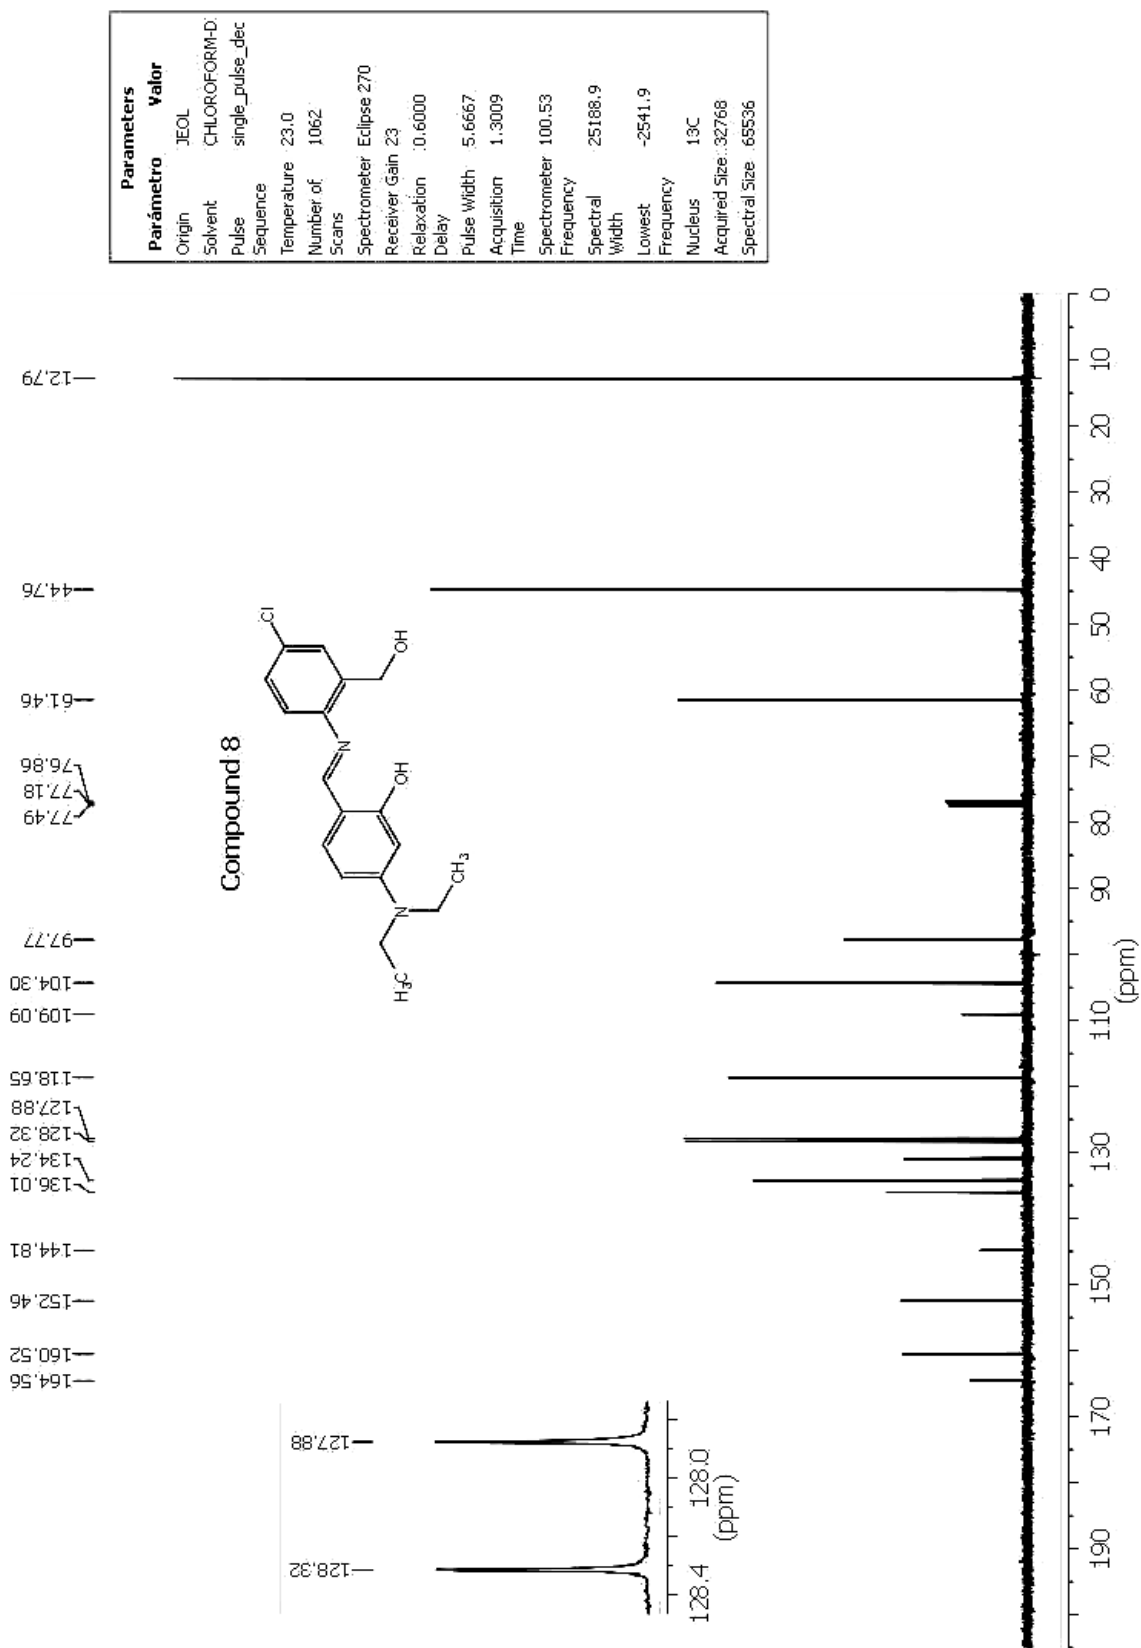

Figure of aromatic region of  $^1\text{H}$  spectrum of compound **5** in  $\text{DMSO}-d_6$  showing the hydrolysis reaction upon heating in a VT NMR experiment

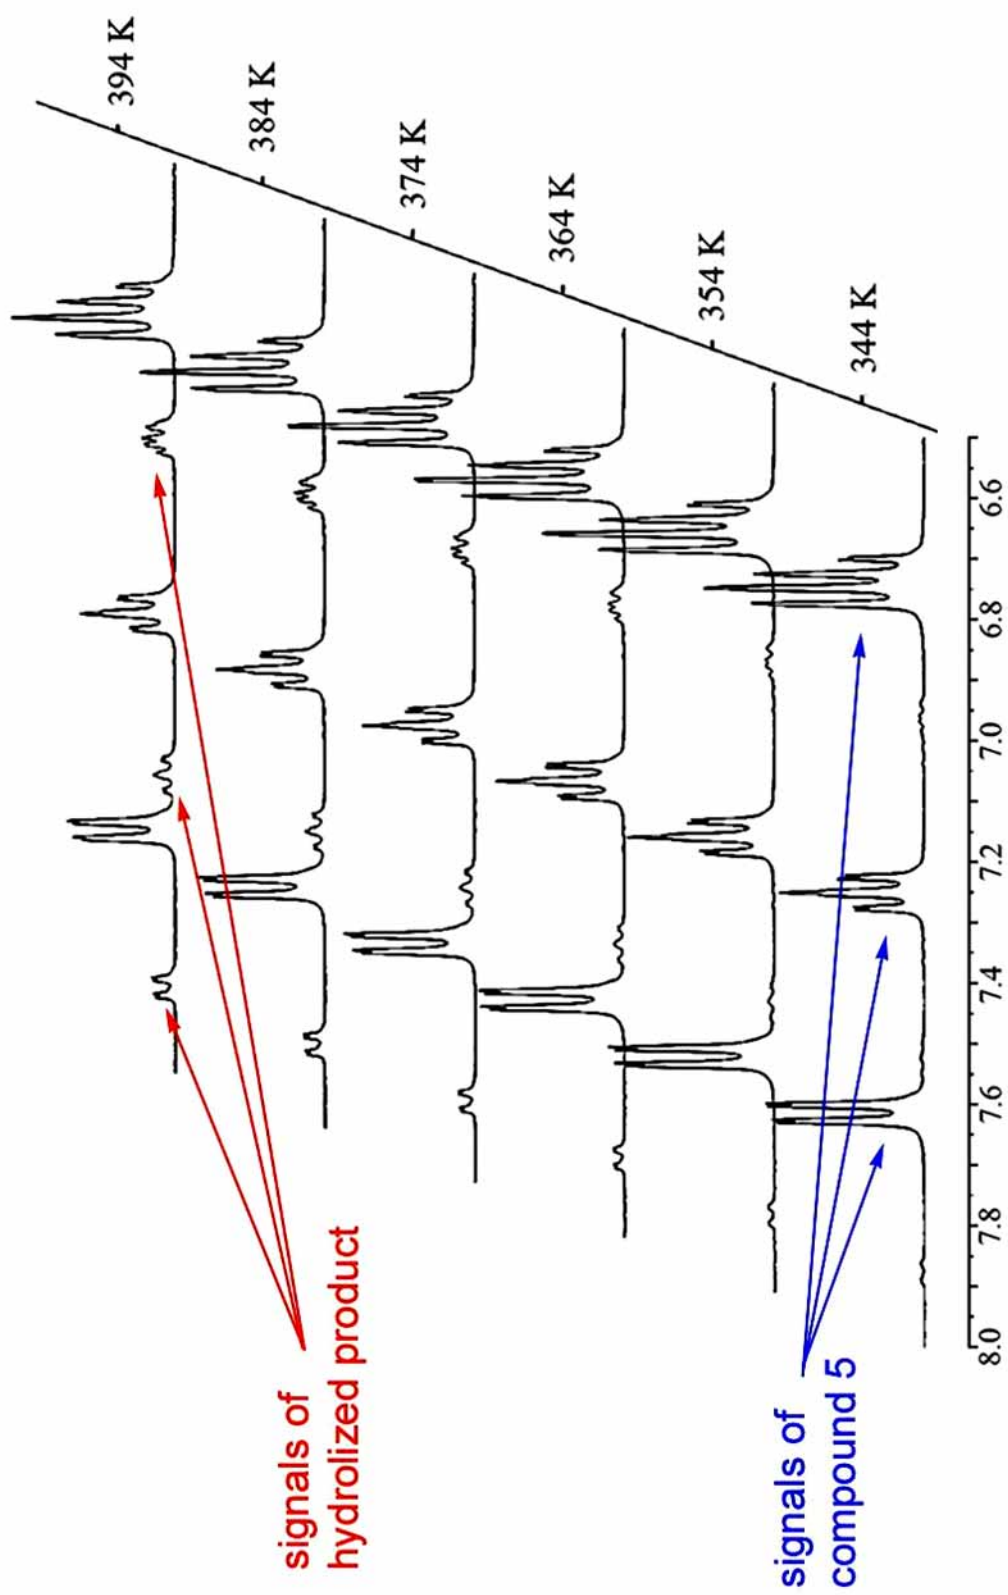



### Solid-state $^{13}\text{C}$ CPMAS spectrum of compound 5

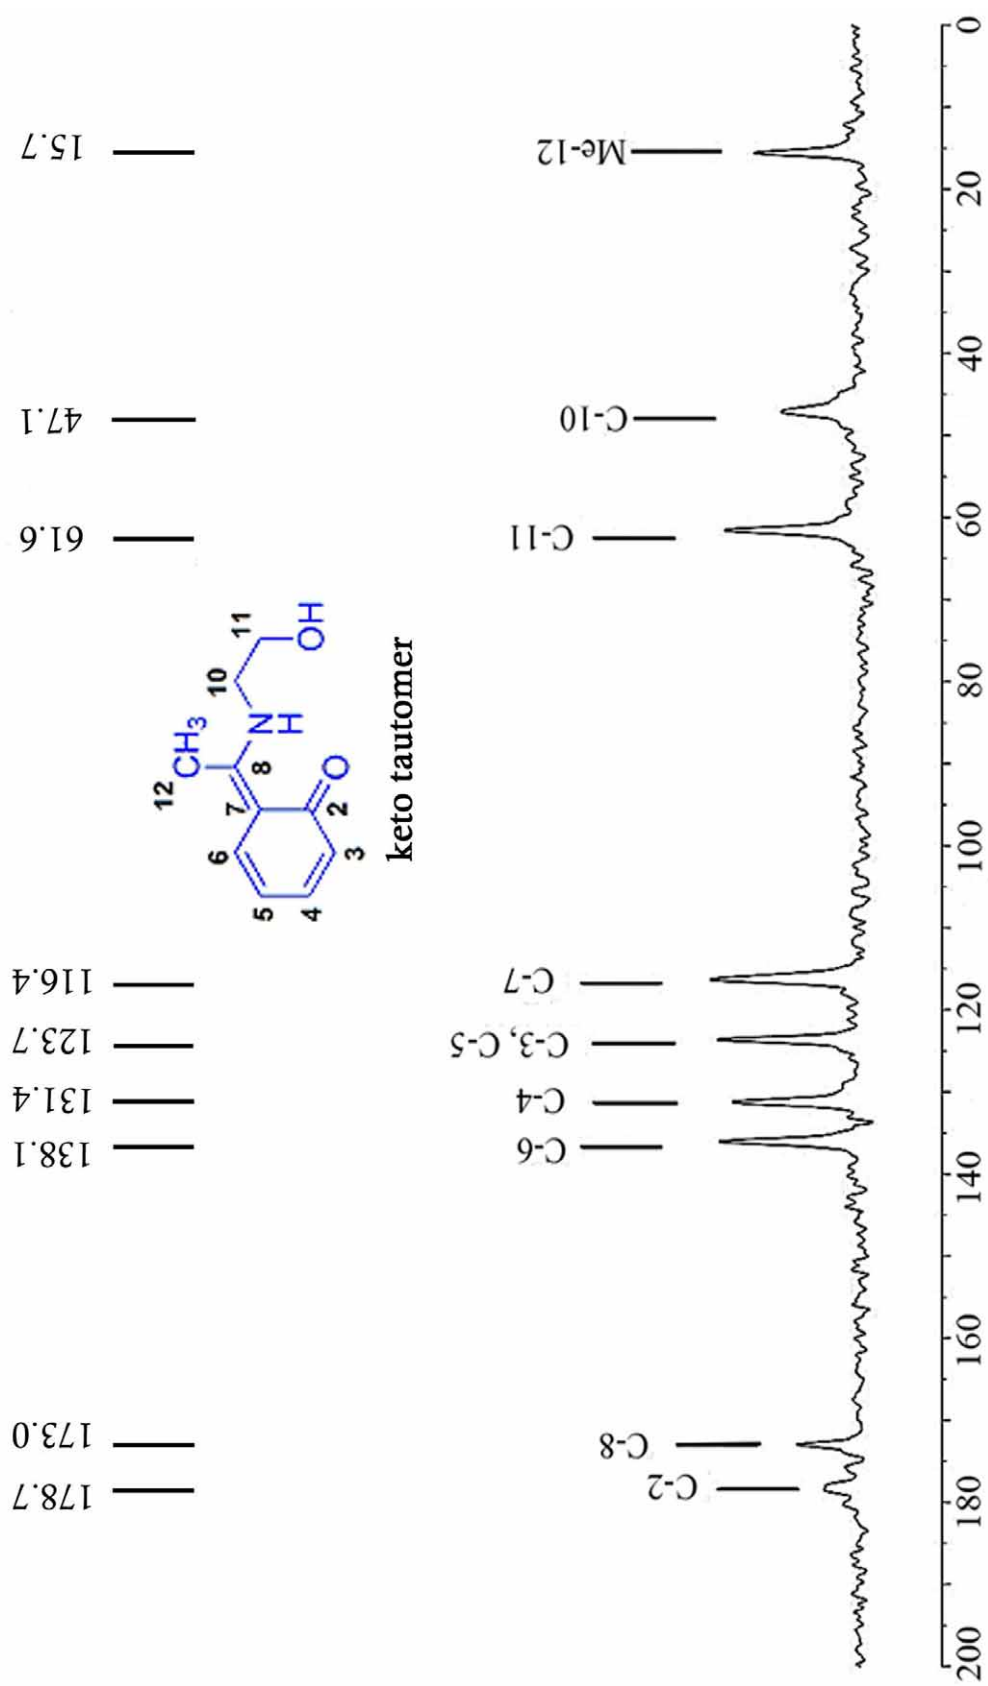

Solid-state  $^{13}\text{C}$  CPMAS NQS (top) and  $^{13}\text{C}$  CPMAS (bottom) spectra of compound **6**

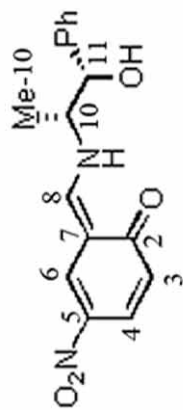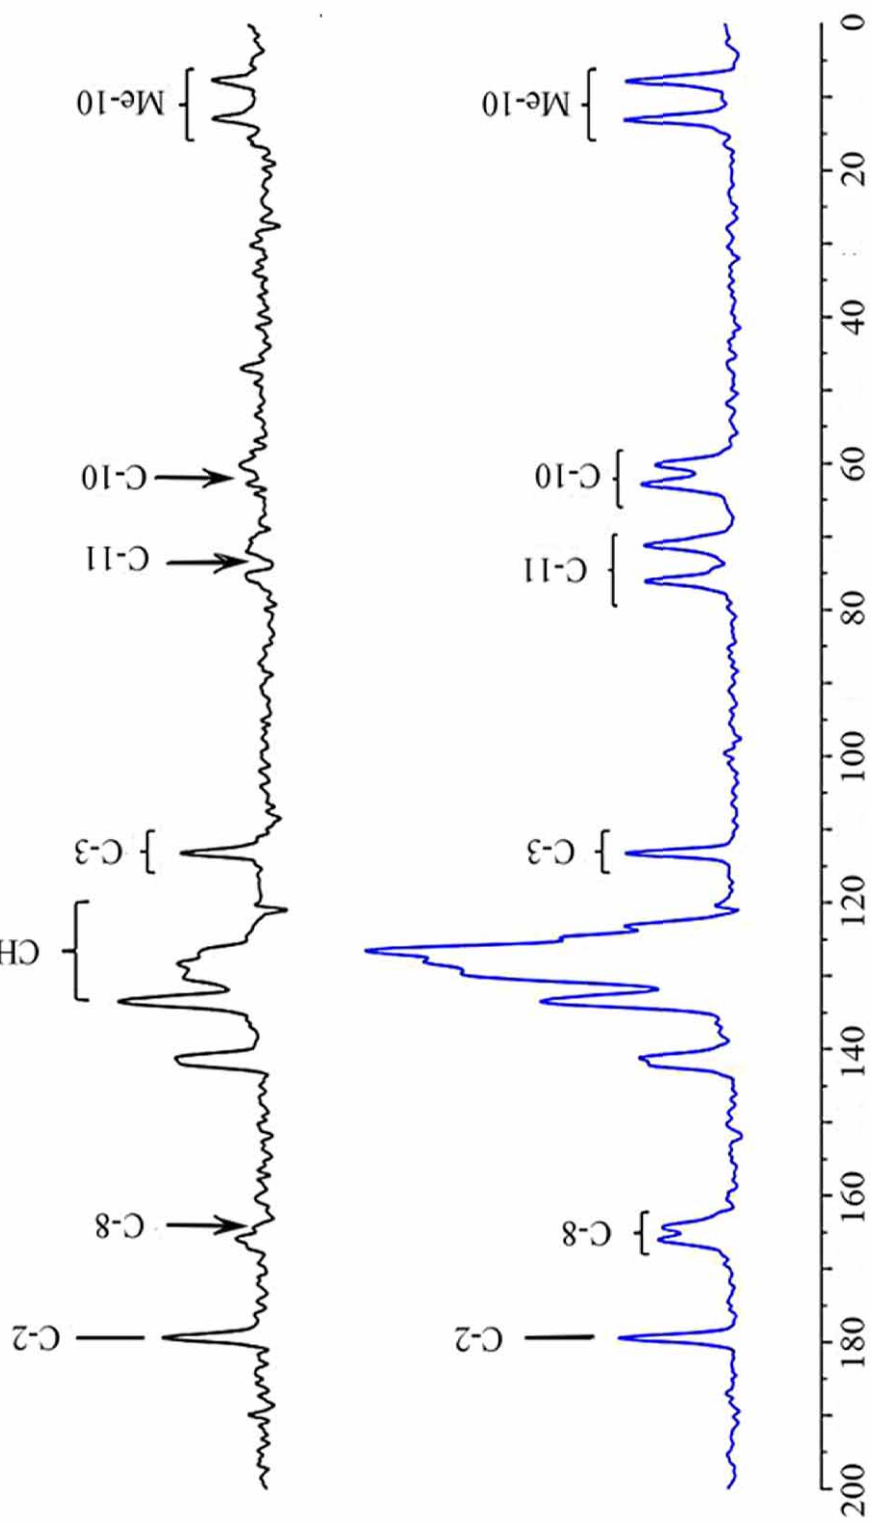



Table 4. Hydrogen-bonding and short intermolecular contact geometry in the crystal structures of  
 compounds **1-8**

|           | <i>D-H...A</i> [Å]             | <i>D-H</i> [Å] | <i>H...A</i> [Å] | <i>D-A</i> [Å] | ∠ <i>D-H...A</i> [°] |
|-----------|--------------------------------|----------------|------------------|----------------|----------------------|
| <b>1a</b> | O1A-H1A...N9A                  | 0.94(2)        | 1.72(2)          | 2.578(2)       | 150(2)               |
|           | O2A-H2A...O2B <sup>i</sup>     | 0.88(3)        | 2.13(3)          | 3.003(2)       | 173(3)               |
|           | C22A-H22C...O1A                | 0.96           | 2.35             | 2.993(2)       | 124                  |
|           | C23A-H23A...O1A                | 0.96           | 2.35             | 3.005(3)       | 125                  |
| <b>1b</b> | O1B-H1B...N9B                  | 1.00(3)        | 1.63(3)          | 2.583(2)       | 156(2)               |
|           | O2B-H2B...O2A <sup>ii</sup>    | 0.87(3)        | 2.19(3)          | 3.039 (2)      | 168(2)               |
|           | C15B-H15F...O1B <sup>iii</sup> | 0.97           | 2.59             | 3.455 (3)      | 149                  |
|           | C22B-H22F...O1B                | 0.96           | 2.38             | 3.005(3)       | 122                  |
|           | C23B-H23E...O1B                | 0.96           | 2.36             | 3.012(3)       | 125                  |
| <b>2a</b> | O1A-H1A...N9A                  | 0.87(3)        | 1.78(3)          | 2.591(2)       | 155(3)               |
|           | O2A-H2A...O2B <sup>iv</sup>    | 0.82           | 2.03             | 2.764(5)       | 149                  |
|           | C23A-H23A...O1A                | 0.96           | 2.36             | 3.000(3)       | 124                  |
|           | C24A-H24C...O1A                | 0.96           | 2.34             | 2.985(3)       | 124                  |
| <b>2b</b> | O1B-H1B...N9B                  | 0.99(3)        | 1.65(3)          | 2.587(2)       | 157(3)               |
|           | O2B-H2B...O2A <sup>v</sup>     | 0.82           | 1.86             | 2.622(6)       | 155                  |
|           | C22B-H22D...O1B                | 0.96           | 2.33             | 2.976(3)       | 125                  |
|           | C23B-H23F...O1B                | 0.96           | 2.33             | 2.984(4)       | 124                  |
| <b>3</b>  | O1-H1...N9                     | 0.88(3)        | 1.77(3)          | 2.553(4)       | 147(4)               |
|           | O2-H2...O1 <sup>vi</sup>       | 0.83(4)        | 2.04(4)          | 2.866(3)       | 176(5)               |
| <b>4</b>  | N9-H9...O1                     | 0.85(5)        | 1.88(5)          | 2.578(3)       | 139(4)               |
|           | O2-H2...O1 <sup>vii</sup>      | 0.76(4)        | 2.01(4)          | 2.752(3)       | 165(4)               |
|           | C10-H10B...O2 <sup>viii</sup>  | 0.97           | 2.56             | 3.445(4)       | 151                  |
| <b>5</b>  | N9-H9...O1                     | 0.99(2)        | 1.60(2)          | 2.512(2)       | 152(2)               |
|           | O2-H2...O1 <sup>ix</sup>       | 0.83(2)        | 1.93(2)          | 2.750(2)       | 173(2)               |
|           | C6-H6...O1 <sup>iii</sup>      | 0.93           | 2.60             | 3.462(2)       | 155                  |
|           | C12-H12F...O2                  | 0.96           | 2.45             | 3.194(2)       | 134                  |
| <b>6a</b> | N9A-H9A...O1A                  | 0.87(3)        | 1.82(3)          | 2.583(5)       | 145(4)               |
|           | O2A-H2A...O1B                  | 0.85(7)        | 1.90(7)          | 2.728(5)       | 168(7)               |
|           | C6A-H6A...O3B <sup>x</sup>     | 0.93           | 2.55             | 3.300(5)       | 138                  |
|           | C8A-H8A...O3B <sup>x</sup>     | 0.93           | 2.58             | 3.300(5)       | 134                  |
|           | C16A-H16A...O3A <sup>vi</sup>  | 0.93           | 2.49             | 3.330(5)       | 151                  |
| <b>6b</b> | N9B-H9B...O1B                  | 0.89(6)        | 1.85(5)          | 2.593(5)       | 140(4)               |
|           | O2B-H2B...O1A                  | 0.78(7)        | 1.95(7)          | 2.725(4)       | 175(10)              |

|           |                                |          |          |           |         |
|-----------|--------------------------------|----------|----------|-----------|---------|
| <b>7a</b> | N9A–H9A…O1A                    | 0.92(12) | 1.86(10) | 2.549(4)  | 130(13) |
|           | O2A–H2A…O1B <sup>vii</sup>     | 0.87(6)  | 1.86(6)  | 2.721(5)  | 169(7)  |
| <b>7b</b> | N9B–H9B…O1B                    | 0.91(9)  | 1.80(9)  | 2.543(5)  | 137(10) |
|           | O2B–H2B…O1A <sup>iv</sup>      | 0.79(6)  | 1.93(7)  | 2.719(5)  | 171(6)  |
|           | C10B–H10B…Br1A <sup>xii</sup>  | 0.98     | 2.87     | 3.692(6)  | 142     |
|           | C11B–H11B…Br1A <sup>xiii</sup> | 0.98     | 2.86     | 3.572(4)  | 130     |
| <b>8a</b> | C14B–H14B…O2A <sup>xiv</sup>   | 0.93     | 2.45     | 3.321 (7) | 157     |
|           | O1A–H1A…N9A                    | 0.86(3)  | 1.79(4)  | 2.588(4)  | 154(4)  |
| <b>8b</b> | O2A–H2A…O1B <sup>xv</sup>      | 0.79(4)  | 1.96(4)  | 2.735(4)  | 169(4)  |
|           | N9B–H9B…O1B                    | 0.85(4)  | 1.85(3)  | 2.622(3)  | 151(4)  |
|           | O2B–H2B…O1B <sup>xvi</sup>     | 0.78(5)  | 1.93(5)  | 2.702(4)  | 175(4)  |
|           | C8B–H8B…O2A <sup>xvii</sup>    | 0.93     | 2.47     | 3.287(4)  | 147     |

Symmetry code: (i) 1+x, 1/2-y, -1/2+z; (ii) -1+x, y, z; (iii) x, 1/2-y, 1/2+z; (iv) x, -1+y, z; (v) 2-x, 1-y, -z; (vi) -1+x, y, z; (vii) x, 1+y, z; (viii) -1/2+x, 1-y, z; (ix) -x, -1/2+y, 1/2-z; (x) 1+x, y, -1+z; (xi) x, 1+y, 1+z; (xii) 1+x, -2+y, z; (xiii) x, -2+y, z; (xiv) x, -1+y, -1+z; (xv) 1+x, y, 1+z; (xvi) -x, -y, -z; (xvii) 2-x, -y, 1-z;

Figure of the C=O ...Br and C-H... Br contacts in compound 7

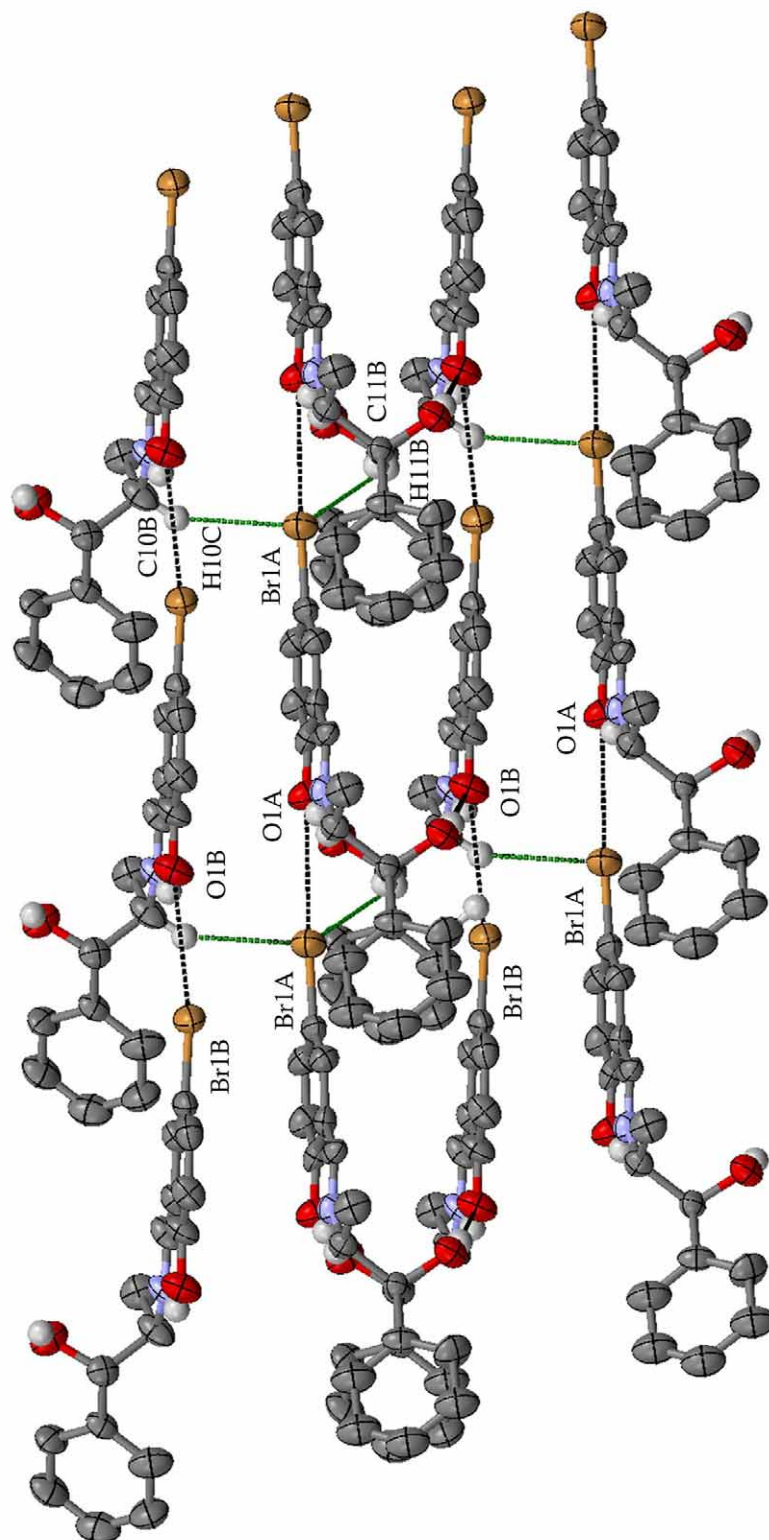

Supplement: c0nj00179a.pdf [file c0nj00179a.pdf]
